# Supplementary material for: Synthesis of benzo[d]imidazo[2,1-b]benzoselenoazoles: Cs2CO3-mediated cyclization of 1-(2-bromoaryl)benzimidazoles with selenium
Source: publisher site journal article supplement (doi:10.3762/bjoc.15.199), 2019-08-26

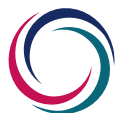

## Supporting Information

for

### **Synthesis of benzo[*d*]imidazo[2,1-*b*]benzoselenoazoles: Cs<sub>2</sub>CO<sub>3</sub>-mediated cyclization of 1-(2-bromoaryl)benzimidazoles with selenium**

Mio Matsumura, Yuki Kitamura, Arisa Yamauchi, Yoshitaka Kanazawa, Yuki Murata, Tadashi Hyodo, Kentaro Yamaguchi and Shuji Yasuike

*Beilstein J. Org. Chem.* **2019**, *15*, 2029–2035. doi:10.3762/bjoc.15.199

### **Experimental details and analytical data, copies of absorption and NMR spectra**

## Contents

|                                                                        |     |
|------------------------------------------------------------------------|-----|
| 1. General information                                                 | S2  |
| 2. Experimental details and characterization data                      | S2  |
| 3. X-ray crystal structure determinations of <b>2a</b>                 | S8  |
| 4. Absorption spectra of benzoimidazo[2,1- <i>b</i> ]benzoselenoazoles | S9  |
| 5. References                                                          | S9  |
| 6. NMR spectra of new compounds                                        | S10 |

## 1. General information

Melting points were measured on a Yanagimoto micro melting point hot-stage apparatus (MP-S3) and reported as uncorrected values.  $^1\text{H}$  NMR (400 MHz, TMS:  $\delta$ : 0.00 ppm as an internal standard),  $^{13}\text{C}$  NMR (100 MHz,  $\text{CDCl}_3$ :  $\delta$ : 77.00 or  $\text{DMSO}-d_6$ :  $\delta$ : 39.52 ppm as an internal standard),  $^{19}\text{F}$  NMR (376 MHz, benzotrifluoride:  $\delta$ : -64.0 ppm as an external standard) and  $^{77}\text{Se}$  NMR (76 MHz, diphenyl diselenide:  $\delta$ : 463.15 ppm as external standard) spectra were recorded on JEOL ECZ-400S spectrometers in  $\text{CDCl}_3$ . Mass spectra were obtained on a JEOL JMP-DX300 instrument (70 eV, 300 mA). IR spectra were recorded on a Shimadzu FTIR-8400S spectrophotometer and reported in terms of frequency of absorption ( $\text{cm}^{-1}$ ). Only selected IR bands are reported. UV-vis spectra were recorded at room temperature on a HITACHI U-2800A spectrophotometer and fluorescence spectra on a JASCO FP-8300 luminescence spectrometer. Chromatographic separations were carried out using Silica Gel 60N (Kanto Chemical Co., Inc.) under the solvent system stated. Thin-layer chromatography (TLC) was performed using Merck Pre-coated TLC plates (silica gel 60 F254). 1-Phenylbenzimidazole (**11**)<sup>1</sup> and di-*p*-tolyl diselenide (**12b**)<sup>2</sup> were prepared according to the published procedure. Other reagents were purchased from Wako Pure Chemical Industries, Kanto Chemical Co., Inc., and Tokyo Chemical Industry Co., Ltd.

## 2. Experimental details and characterization data

### General procedure for the synthesis of 1-(2-bromoaryl)benzimidazoles:

Benzimidazole (5 mmol), 1-bromo-2-fluorobenzene derivatives (15 mmol, 2 equiv) and tripotassium phosphate (5.31 g, 25 mmol, 5 equiv) were dissolved in DMF (30 mL). The mixture was stirred at 150 °C. The reaction time was determined by monitoring with TLC. The reaction mixture was diluted with  $\text{CH}_2\text{Cl}_2$  (50 mL) and water (50 mL). The phases were separated, and the aqueous layer was extracted with  $\text{CH}_2\text{Cl}_2$  ( $2 \times 30$  mL). The combined organic layers were washed with water ( $3 \times 50$  mL), dried with  $\text{MgSO}_4$ , and concentrated under reduced pressure. The residue was purified by silica gel chromatography (*n*-hexane/AcOEt).

1-(2-Bromophenyl)benzimidazole (**1a**)<sup>1</sup>: Yield 2.76 g (99%); colorless prism; mp 93.5-95 °C (from *n*-hexane/ $\text{CH}_2\text{Cl}_2$ );  $R_f$  = 0.5 (*n*-hexane/EtOAc = 1:2);  $^1\text{H}$  NMR (400 MHz,  $\text{CDCl}_3$ )  $\delta$  = 7.19 (1H, dd,  $J$  = 6.8, 1.9 Hz, Ar-H), 7.26-7.53 (5H, m, Ar-H), 7.81 (1H, dd,  $J$  = 7.9, 1.1 Hz, Ar-H), 7.90 (1H, dd,  $J$  = 6.4, 1.5 Hz, Ar-H), 8.04 (1H, s, Ar-H);  $^{13}\text{C}$  NMR (100 MHz,  $\text{CDCl}_3$ )  $\delta$  = 110.5 (CH), 120.4 (CH), 121.4 (C), 122.7 (CH), 123.6 (CH), 128.6 (CH),

129.0 (CH), 130.5 (CH), 134.1 (CH), 134.2 (C), 135.1 (C), 142.9 (CH), 143.1 (C); LRMS (EI)  $m/z$  272 ( $M^+$ , 100), 193 (94), 166 (40), 140 (18), 75 (20); HRMS:  $m/z$  [ $M$ ] $^+$  calcd for  $C_{13}H_9BrN_2$ : 271.9949. Found: 271.9944.

1-(2-Bromo-5-methoxyphenyl)benzimidazole (**1b**): Yield 929 mg (31%); colorless prism; mp 131-132 °C (from *n*-hexane/ $CH_2Cl_2$ );  $R_f$  = 0.2 (*n*-hexane/EtOAc = 3:2);  $^1H$  NMR (400 MHz,  $CDCl_3$ )  $\delta$  = 3.83 (3H, s,  $CH_3$ ), 6.95-6.99 (2H, m, Ar-H), 7.23 (1H, dd,  $J$  = 5.5, 1.8 Hz, Ar-H), 7.30-7.37 (2H, m, Ar-H), 7.67 (1H, d,  $J$  = 8.7 Hz, Ar-H), 7.89 (1H, dd,  $J$  = 6.9, 1.4 Hz, Ar-H), 8.05 (1H, s, Ar-H);  $^{13}C$  NMR (100 MHz,  $CDCl_3$ )  $\delta$  = 55.8 ( $CH_3$ ), 110.6 (CH), 111.3 (C), 114.5 (CH), 116.6 (CH), 120.4 (CH), 122.7 (CH), 123.7 (CH), 134.1 (C), 134.4 (CH), 135.7 (C), 142.9 (CH), 143.1 (C), 159.7 (C); IR (KBr);  $\nu$  = 3078, 1597, 1497, 1217, 735  $cm^{-1}$ ; LRMS (EI)  $m/z$  304 ([ $M+2$ ] $^+$ , 98), 302 ( $M^+$ , 100), 223 (93), 179 (25); HRMS:  $m/z$  [ $M$ ] $^+$  calcd for  $C_{14}H_{11}BrN_2O$ : 302.0055. Found: 302.0050.

1-(2-Bromo-5-methylphenyl)benzimidazole (**1c**): Yield 2.75 g (96%); colorless plate; mp 91-93 °C (from *n*-hexane/ $CH_2Cl_2$ );  $R_f$  = 0.3 (*n*-hexane/EtOAc = 3:2);  $^1H$  NMR (400 MHz,  $CDCl_3$ )  $\delta$  = 2.39 (3H, s,  $CH_3$ ), 7.17-7.21 (2H, m, Ar-H), 7.24 (1H, d,  $J$  = 2.7 Hz, Ar-H), 7.29 (1H, td,  $J$  = 7.3, 1.9 Hz, Ar-H), 7.32 (1H, td,  $J$  = 7.3, 1.9 Hz, Ar-H), 7.65 (1H, d,  $J$  = 8.2 Hz, Ar-H), 7.87 (1H, d,  $J$  = 7.3 Hz, Ar-H), 8.01 (1H, s, Ar-H);  $^{13}C$  NMR (100 MHz,  $CDCl_3$ )  $\delta$  = 20.8 ( $CH_3$ ), 110.6 (CH), 117.8 (C), 120.4 (CH), 122.6 (CH), 123.6 (CH), 129.6 (CH), 131.4 (CH), 133.7 (CH), 134.3 (C), 134.8 (C), 139.1 (C), 142.9 (CH), 143.2 (C); IR (KBr);  $\nu$  = 3055, 1495, 1288, 1209, 752  $cm^{-1}$ ; LRMS (EI)  $m/z$  288 ([ $M+2$ ] $^+$ , 98), 286 ( $M^+$ , 100), 207 (97), 192 (63); HRMS:  $m/z$  [ $M$ ] $^+$  calcd for  $C_{14}H_{11}BrN_2$ : 286.0106. Found: 286.0105.

1-(2,5-Dibromophenyl)benzimidazole (**1d**): Yield 3.11 g (92%); pale red plate; mp 123.5-125 °C (from *n*-hexane/ $CH_2Cl_2$ );  $R_f$  = 0.5 (*n*-hexane/EtOAc = 3:2);  $^1H$  NMR (400 MHz,  $CDCl_3$ )  $\delta$  = 7.21 (1H, d,  $J$  = 7.8 Hz, Ar-H), 7.31-7.38 (2H, m, Ar-H), 7.54 (1H, dd,  $J$  = 8.7, 2.2 Hz, Ar-H), 7.62 (1H, d,  $J$  = 2.2 Hz, Ar-H), 7.68 (1H, d,  $J$  = 8.2 Hz, Ar-H), 7.89 (1H, dd,  $J$  = 6.4, 1.3 Hz, Ar-H), 8.03 (1H, s, Ar-H);  $^{13}C$  NMR (100 MHz,  $CDCl_3$ )  $\delta$  = 110.5 (CH), 120.3 (C), 120.7 (CH), 121.9 (C), 123.1 (CH), 124.1 (CH), 132.1 (CH), 133.8 (CH), 134.1 (C), 135.3 (CH), 136.5 (C), 142.6 (CH), 143.3 (C); IR (KBr);  $\nu$  = 3049, 1489, 1229, 993, 735  $cm^{-1}$ ; LRMS (EI)  $m/z$  352 ( $M^+$ , 100), 192 (80), 271 (35); HRMS:  $m/z$  [ $M$ ] $^+$  calcd for  $C_{13}H_8Br_2N_2$ : 349.9054. Found: 349.9056.

1-(2-Bromo-5-chlorophenyl)benzimidazole (**1e**): Yield 1.43 g (93%); pale red plate; mp 94-96.5 °C (from *n*-hexane/ $CH_2Cl_2$ );  $R_f$  = 0.4 (*n*-hexane/EtOAc = 3:2);  $^1H$  NMR (400 MHz,  $CDCl_3$ )  $\delta$  = 7.22 (1H, d,  $J$  = 8.5 Hz, Ar-H), 7.31-7.39 (2H, m, Ar-H), 7.41 (1H, dd,  $J$  = 8.2, 2.3 Hz, Ar-H), 7.48 (1H, d,  $J$  = 2.3 Hz, Ar-H), 7.76 (1H, d,  $J$  = 8.5

Hz, Ar-H), 7.89 (1H, d,  $J$  = 6.6 Hz, Ar-H), 8.04 (1H, s, Ar-H);  $^{13}\text{C}$  NMR (100 MHz,  $\text{CDCl}_3$ )  $\delta$  = 110.4 (CH), 119.4 (C), 120.7 (CH), 123.0 (CH), 124.0 (CH), 129.2 (CH), 130.7 (CH), 134.0 (C), 134.4 (C), 135.0 (CH), 136.2 (C), 142.5 (CH), 143.2 (C); IR (KBr);  $\nu$  = 3051, 1489, 1230, 737  $\text{cm}^{-1}$ ; LRMS (EI)  $m/z$  308 ( $[\text{M}+2]^+$ , 100), 306 ( $[\text{M}]^+$ , 90), 192 (97), 227 (68); HRMS:  $m/z$   $[\text{M}]^+$  calcd for  $\text{C}_{13}\text{H}_8\text{BrClN}_2$ : 305.9559. Found: 305.9562.

1-(2-Bromo-5-trifluoromethylphenyl)benzimidazole (**1f**): Yield 3.15 g (92%); colorless prism; mp 96-97.5 °C (from *n*-hexane/ $\text{CH}_2\text{Cl}_2$ );  $R_f$  = 0.4 (*n*-hexane/EtOAc = 3:2);  $^1\text{H}$  NMR (400 MHz,  $\text{CDCl}_3$ )  $\delta$  = 7.19 (1H, d,  $J$  = 8.3 Hz, Ar-H), 7.35 (1H, t,  $J$  = 7.3 Hz, Ar-H), 7.38 (1H, t,  $J$  = 6.4 Hz, Ar-H), 7.68 (1H, d,  $J$  = 6.9 Hz, Ar-H), 7.74 (1H, s, Ar-H), 7.91 (1H, d,  $J$  = 7.8 Hz, Ar-H), 7.99 (1H, d,  $J$  = 8.3 Hz, Ar-H), 8.07 (1H, s, Ar-H);  $^{13}\text{C}$  NMR (100 MHz,  $\text{CDCl}_3$ )  $\delta$  = 110.2 (CH), 120.7 (CH), 123.0 (q,  $J$  = 272 Hz,  $\text{CF}_3$ ), 123.2 (CH), 124.1 (CH), 125.6 (C), 126.0 (q,  $J$  = 3.9 Hz, CH), 127.2 (q,  $J$  = 3.8 Hz, CH), 131.5 (q,  $J$  = 34 Hz, C), 133.9 (C), 135.1 (CH), 136.0 (C), 142.4 (CH), 143.2 (C);  $^{19}\text{F}$  NMR (376 MHz,  $\text{CDCl}_3$ )  $\delta$  = -62.6; IR (KBr);  $\nu$  = 3016, 1497, 1290, 1084, 741  $\text{cm}^{-1}$ ; LRMS (EI)  $m/z$  340 ( $\text{M}^+$ , 100), 261 (35), 192 (29); HRMS:  $m/z$   $[\text{M}]^+$  calcd for  $\text{C}_{14}\text{H}_8\text{BrF}_3\text{N}_2$ : 339.9823. Found: 339.9821.

1-(2-Bromophenyl)-5,6-dimethylbenzimidazole (**1g**): Yield 1.49 g (>99%); colorless plate; mp 73-75 °C (from *n*-hexane/ $\text{CH}_2\text{Cl}_2$ );  $R_f$  = 0.2 (*n*-hexane/EtOAc = 3:2);  $^1\text{H}$  NMR (400 MHz,  $\text{CDCl}_3$ )  $\delta$  = 2.34 (3H, s,  $\text{CH}_3$ ), 2.40 (3H, s,  $\text{CH}_3$ ), 6.96 (1H, s, Ar-H), 7.37-7.44 (2H, m, Ar-H), 7.50 (1H, t,  $J$  = 7.8 Hz, Ar-H), 7.64 (1H, s, Ar-H), 7.81 (1H, d,  $J$  = 6.8 Hz, Ar-H), 7.93 (1H, s, Ar-H);  $^{13}\text{C}$  NMR (100 MHz,  $\text{CDCl}_3$ )  $\delta$  = 20.2 ( $\text{CH}_3$ ), 20.5 ( $\text{CH}_3$ ), 110.5 (CH), 120.4 (CH), 121.4 (C), 128.6 (CH), 129.1 (CH), 130.4 (CH), 131.6 (C), 132.8 (C), 132.9 (C), 134.1 (CH), 135.4 (C), 141.7 (C), 142.2 (CH); IR (KBr);  $\nu$  = 3090, 1497, 1223, 841, 772  $\text{cm}^{-1}$ ; LRMS (EI)  $m/z$  302 ( $[\text{M}+2]^+$ , 99) 300 ( $\text{M}^+$ , 100), 285 (40), 205 (32); HRMS:  $m/z$   $[\text{M}]^+$  calcd for  $\text{C}_{15}\text{H}_{13}\text{BrN}_2$ : 300.0262. Found: 300.0260.

1-(2-Bromophenyl)-5,6-dichlorobenzimidazole (**1h**): Yield 1.05 g (61%); colorless plate; mp 110-113 °C (from Benzene);  $R_f$  = 0.4 (*n*-hexane/EtOAc = 3:2);  $^1\text{H}$  NMR (400 MHz,  $\text{CDCl}_3$ )  $\delta$  = 7.29 (1H, s, Ar-H), 7.44 (1H, d,  $J$  = 8.2 Hz, Ar-H), 7.45 (1H, td,  $J$  = 7.8, 1.9 Hz, Ar-H), 7.55 (1H, td,  $J$  = 7.8, 3.0 Hz, Ar-H), 7.83 (1H, d,  $J$  = 5.3 Hz, Ar-H), 7.98 (1H, s, Ar-H), 8.04 (1H, s, Ar-H);  $^{13}\text{C}$  NMR (100 MHz,  $\text{CDCl}_3$ )  $\delta$  = 112.1 (CH), 121.5 (C), 121.8 (CH), 127.2 (C), 128.1 (C), 129.0 (CH), 129.1 (CH), 131.3 (CH), 133.6 (C), 134.4 (C), 134.5 (CH), 142.6 (C), 144.8 (CH); IR (KBr);  $\nu$  = 3096, 1493, 1236, 1096, 766  $\text{cm}^{-1}$ ; LRMS (EI)  $m/z$  342 ( $[\text{M}+2]^+$ , 100), 226 (50), 261 (30); HRMS:  $m/z$   $[\text{M}]^+$  calcd for  $\text{C}_{13}\text{H}_7\text{BrCl}_2\text{N}_2$ : 339.9170. Found: 39.9171.

1-(2-Bromophenyl)imidazole (**1i**)<sup>3</sup>: Yield 793 mg (36%); orange oil;  $R_f$  = 0.5 (EtOAc);  $^1\text{H}$  NMR (400 MHz,  $\text{CDCl}_3$ )

$\delta$  = 7.14 (1H, s, Ar-H), 7.21 (1H, s, Ar-H), 7.31-7.35 (2H, m, Ar-H), 7.45 (1H, td,  $J$  = 7.6 Hz, Ar-H), 7.68 (1H, s, Ar-H), 7.74 (1H, d,  $J$  = 6.8 Hz, Ar-H);  $^{13}\text{C}$  NMR (100 MHz,  $\text{CDCl}_3$ )  $\delta$  = 119.9 (C), 120.5 (CH), 128.0 (CH), 128.4 (CH), 129.3 (CH), 130.1 (CH), 133.9 (CH), 136.7 (CH), 137.5 (CH); IR (KBr);  $\nu$  = 3111, 1499, 1061, 760  $\text{cm}^{-1}$ ; LRMS (EI)  $m/z$  222 ( $\text{M}^+$ , 100), 195 (18), 155 (16), 116, (83), 89 (33); HRMS:  $m/z$  [ $\text{M}$ ] $^+$  calcd for  $\text{C}_9\text{H}_7\text{BrN}_2$ : 221.9793. Found: 221.9791.

#### General procedure for the synthesis of benzimidazo[2,1-*b*]benzoselenoazoles:

1-(2-Bromoaryl)benzimidazoles **1** (0.5 mmol), selenium powder (79 mg, 1.0 mmol, 2 equiv), and cesium carbonate (326 mg, 1.0 mmol, 2 equiv) were dissolved in DMF (1 mL) under Ar atmosphere. The mixture was stirred at 150 °C for 24 h. The reaction mixture was diluted with  $\text{CH}_2\text{Cl}_2$  (15 mL) and water (15 mL). The phases were separated, and the aqueous layer was extracted with  $\text{CH}_2\text{Cl}_2$  (2  $\times$  10 mL). The combined organic layers were washed with water (2  $\times$  20 mL), dried with  $\text{MgSO}_4$ , and concentrated under reduced pressure. The residue was purified by silica gel chromatography (*n*-hexane/AcOEt).

Benzimidazo[2,1-*b*]benzoselenoazole (**2a**): Yield 125 mg (93%); yellow needle; mp 152.5-154 °C (from *n*-hexane/ $\text{CH}_2\text{Cl}_2$ );  $R_f$  = 0.5 (*n*-hexane/EtOAc = 3:2);  $^1\text{H}$  NMR (400 MHz,  $\text{CDCl}_3$ )  $\delta$  = 7.27 (1H, t,  $J$  = 7.3 Hz, Ar-H), 7.33-7.40 (2H, m, Ar-H), 7.51 (1H, t,  $J$  = 7.3 Hz, Ar-H), 7.73 (1H, d,  $J$  = 7.8 Hz, Ar-H), 7.81 (1H, dd,  $J$  = 7.3, 1.5 Hz, Ar-H), 7.96 (2H, d,  $J$  = 8.3 Hz, Ar-H);  $^{13}\text{C}$  NMR (100 MHz,  $\text{CDCl}_3$ )  $\delta$  = 110.7 (CH), 113.3 (CH), 119.2 (CH), 122.0 (CH), 123.3 (CH), 124.5 (CH), 127.0 (CH), 127.2 (CH), 127.3 (C), 131.6 (C), 134.6 (C), 148.0 (C), 152.7 (C); IR (KBr);  $\nu$  = 1476, 1445, 1238, 731  $\text{cm}^{-1}$ ; LRMS (EI)  $m/z$  272 ( $\text{M}^+$ , 100), 192 (13); HRMS:  $m/z$  [ $\text{M}$ ] $^+$  calcd for  $\text{C}_{13}\text{H}_8\text{N}_2\text{Se}$ : 271.9853. Found: 271.9850.

2-Methylbenzimidazo[2,1-*b*]benzoselenoazole (**4**): Yield 101 mg (70%); colorless needle; mp 219-221.5 °C (from *n*-hexane/ $\text{CH}_2\text{Cl}_2$ );  $R_f$  = 0.6 (*n*-hexane/EtOAc = 3:2);  $^1\text{H}$  NMR (400 MHz,  $\text{CDCl}_3$ )  $\delta$  = 2.52 (3H, s,  $\text{CH}_3$ ), 7.09 (1H, d,  $J$  = 7.7 Hz, Ar-H), 7.32-7.40 (2H, m, Ar-H), 7.57 (1H, d,  $J$  = 7.8 Hz, Ar-H), 7.76 (1H, s, Ar-H), 7.80 (1H, d,  $J$  = 7.1 Hz, Ar-H), 7.96 (1H, dd,  $J$  = 7.1, 1.8 Hz, Ar-H);  $^{13}\text{C}$  NMR (100 MHz,  $\text{CDCl}_3$ )  $\delta$  = 21.7 ( $\text{CH}_3$ ), 110.7 (CH), 114.0 (CH), 119.1 (CH), 121.8 (CH), 123.2 (CH), 123.7 (C), 125.5 (CH), 126.8 (CH), 131.6 (C), 134.7 (C), 137.4 (C), 148.1 (C), 153.1 (C);  $^{77}\text{Se}$  NMR (76 MHz,  $\text{CDCl}_3$ )  $\delta$  = 348.0; IR (KBr);  $\nu$  = 1559, 1487, 1244, 733  $\text{cm}^{-1}$ ; LRMS (EI)  $m/z$  286 ( $\text{M}^+$ , 100), 205 (19), 78 (18); HRMS:  $m/z$  [ $\text{M}$ ] $^+$  calcd for  $\text{C}_{14}\text{H}_{10}\text{N}_2\text{Se}$ : 286.0009. Found: 286.0006.

2-Chlorobenzimidazo[2,1-*b*]benzoselenoazole (**6**): Yield 76 mg (49%); pale yellow needle; mp 264.5-267 °C (from chloroform);  $R_f$  = 0.5 (*n*-hexane/EtOAc = 3:2);  $^1\text{H}$  NMR (400 MHz,  $\text{CDCl}_3$ )  $\delta$  = 7.35-7.42 (2H, m, Ar-H), 7.46 (1H, dd,  $J$  = 8.2, 1.8 Hz, Ar-H), 7.74 (1H, dd,  $J$  = 6.8, 1.8 Hz, Ar-H), 8.18 (1H, d,  $J$  = 8.7 Hz, Ar-H), 8.39 (1H, d,  $J$  = 1.8 Hz, Ar-H), 8.46 (1H, dd,  $J$  = 6.4, 1.8 Hz, Ar-H);  $^{13}\text{C}$  NMR (100 MHz,  $\text{CDCl}_3$ )  $\delta$  = 110.7 (CH), 113.7 (CH), 119.4 (CH), 122.3 (CH), 123.7 (CH), 124.6 (CH), 125.4 (C), 127.9 (CH), 131.4 (C), 133.2 (C), 135.3 (C), 148.1 (C), 152.8 (C);  $^{77}\text{Se}$  NMR (76 MHz,  $\text{CDCl}_3$ )  $\delta$  = 356.0; IR (KBr);  $\nu$  = 1487, 1449, 1221, 731, 550  $\text{cm}^{-1}$ ; LRMS (EI)  $m/z$  306 ( $\text{M}^+$ , 100), 191 (10), 153 (10); HRMS:  $m/z$  [ $\text{M}$ ] $^+$  calcd for  $\text{C}_{13}\text{H}_7\text{ClN}_2\text{Se}$ : 305.9463. Found: 305.9466.

2-Trifluoromethylbenzimidazo[2,1-*b*]benzoselenoazole (**7**): Yield 107 mg (63%); colorless needle; mp 207-208 °C (from *n*-hexane/ $\text{CH}_2\text{Cl}_2$ );  $R_f$  = 0.5 (*n*-hexane/EtOAc = 3:2);  $^1\text{H}$  NMR (400 MHz,  $\text{CDCl}_3$ )  $\delta$  = 7.41-7.47 (2H, m, Ar-H), 7.58 (1H, d,  $J$  = 8.2 Hz, Ar-H), 7.83-7.87 (1H, m, Ar-H), 7.91 (1H, d,  $J$  = 8.2 Hz, Ar-H), 8.00-8.02 (1H, m, Ar-H), 8.18 (1H, s, Ar-H);  $^{13}\text{C}$  NMR (100 MHz,  $\text{CDCl}_3$ )  $\delta$  = 109.8 (CH), 110.7 (CH), 119.6 (CH), 121.0 (CH), 122.6 (CH), 123.8 (q,  $J$  = 272 Hz,  $\text{CF}_3$ ), 123.9 (CH), 127.7 (CH), 129.8 (q,  $J$  = 33 Hz, C), 131.4 (C), 131.9 (C), 134.8 (C), 148.1 (C), 152.3 (C);  $^{19}\text{F}$  NMR (376 MHz,  $\text{CDCl}_3$ )  $\delta$  = -63.27;  $^{77}\text{Se}$  NMR (76 MHz,  $\text{CDCl}_3$ )  $\delta$  = 364.3; IR (KBr);  $\nu$  = 1491, 1317, 1109, 73  $\text{cm}^{-1}$ ; LRMS (EI)  $m/z$  340 ( $\text{M}^+$ , 100), 170 (6), 260 (4); HRMS:  $m/z$  [ $\text{M}$ ] $^+$  calcd for  $\text{C}_{14}\text{H}_7\text{F}_3\text{N}_2\text{Se}$ : 339.9727. Found: 339.9725.

8,9-Dimethylbenzimidazo[2,1-*b*]benzoselenoazole (**8**): Yield 137 mg (91%); colorless plate; mp 95-96.5 °C (from *n*-hexane/ $\text{CH}_2\text{Cl}_2$ );  $R_f$  = 0.5 (*n*-hexane/EtOAc = 3:2);  $^1\text{H}$  NMR (400 MHz,  $\text{CDCl}_3$ )  $\delta$  = 2.42 (3H, s,  $\text{CH}_3$ ), 2.47 (3H, s,  $\text{CH}_3$ ), 7.28 (1H, t,  $J$  = 7.8 Hz, Ar-H), 7.53 (1H, t,  $J$  = 7.1 Hz, Ar-H), 7.58 (1H, s, Ar-H), 7.73-7.75 (2H, m, Ar-H), 7.97 (1H, d,  $J$  = 6.9 Hz, Ar-H);  $^{13}\text{C}$  NMR (100 MHz,  $\text{CDCl}_3$ )  $\delta$  = 20.5 ( $\text{CH}_3$ ), 20.7 ( $\text{CH}_3$ ), 111.1 (CH), 113.2 (CH), 119.4 (CH), 124.2 (CH), 127.0 (CH), 127.3 (CH), 127.4 (C), 130.2 (C), 131.0 (C), 132.2 (C), 134.9 (C), 146.8 (C), 151.5 (C);  $^{77}\text{Se}$  NMR (76 MHz,  $\text{CDCl}_3$ )  $\delta$  = 350.1; IR (KBr);  $\nu$  = 3057, 1487, 1244, 1153, 733  $\text{cm}^{-1}$ ; LRMS (EI)  $m/z$  300 ( $\text{M}^+$ , 100), 283 (42); HRMS:  $m/z$  [ $\text{M}$ ] $^+$  calcd for  $\text{C}_{15}\text{H}_{12}\text{N}_2\text{Se}$ : 300.0166. Found: 300.0163.

8,9-Dichlorobenzimidazo[2,1-*b*]benzoselenoazole (**9**): Yield 74 mg (44%); colorless needle; mp 245-247.5 °C (from chloroform);  $R_f$  = 0.7 (*n*-hexane/EtOAc = 3:2);  $^1\text{H}$  NMR (400 MHz,  $\text{CDCl}_3$ )  $\delta$  = 7.34 (1H, t,  $J$  = 7.1 Hz, Ar-H), 7.56 (1H, t,  $J$  = 8.1 Hz, Ar-H), 7.77 (1H, dd,  $J$  = 7.7, 0.9 Hz, Ar-H), 7.87 (1H, s, Ar-H), 7.87 (1H, dd,  $J$  = 5.8, 0.9 Hz, Ar-H), 8.04 (1H, s, Ar-H);  $^{13}\text{C}$  NMR (100 MHz,  $\text{CDCl}_3$ )  $\delta$  = 111.9 (CH), 113.3 (CH), 120.2 (CH), 125.2 (CH), 125.9 (C), 127.37 (CH), 127.43 (CH), 127.5 (C), 130.5 (C), 133.9 (C), 147.2 (C), 155.0 (C);  $^{77}\text{Se}$  NMR (76 MHz,  $\text{CDCl}_3$ )  $\delta$  =

359.3; IR (KBr);  $\nu$  = 1559, 1541, 1506, 1456  $\text{cm}^{-1}$ ; LRMS (EI)  $m/z$  340 ( $\text{M}^+$ , 100), 207 (61), 281 (31); HRMS:  $m/z$   $[\text{M}]^+$  calcd for  $\text{C}_{13}\text{H}_6\text{Cl}_2\text{N}_2\text{Se}$ : 339.9073. Found: 339.9070.

Imidazo[2,1-*b*]benzoselenoazole (**10**): Yield 46 mg (21%); orange oil;  $R_f$  = 0.6 (*n*-hexane/EtOAc = 1:2);  $^1\text{H}$  NMR (400 MHz,  $\text{CDCl}_3$ )  $\delta$  = 7.26 (1H, t,  $J$  = 6.9 Hz, Ar-H), 7.35 (1H, s, Ar-H), 7.43 (1H, t,  $J$  = 6.8 Hz, Ar-H), 7.56 (1H, d,  $J$  = 7.3 Hz, Ar-H), 7.72 (1H, d,  $J$  = 7.8 Hz, Ar-H), 7.75 (1H, s, Ar-H);  $^{13}\text{C}$  NMR (100 MHz,  $\text{CDCl}_3$ )  $\delta$  = 113.1 (CH), 113.6 (CH), 125.0 (CH), 126.6 (CH), 127.3 (CH), 128.9 (C), 133.4 (C), 134.1 (CH), 143.5 (C);  $^{77}\text{Se}$  NMR (76 MHz,  $\text{CDCl}_3$ )  $\delta$  = 369.9; IR (KBr);  $\nu$  = 3015, 1485, 1444, 1321, 1116, 750, 713, 665  $\text{cm}^{-1}$ ; LRMS (EI)  $m/z$  222 ( $\text{M}^+$ , 100), 142 (13); HRMS:  $m/z$   $[\text{M}]^+$  calcd for  $\text{C}_9\text{H}_6\text{N}_2\text{Se}$ : 221.9696. Found: 221.9696.

1-[2-(*p*-Tolylselenanyl)phenyl]benzo[*d*]imidazole (**14**): Yield 55 mg (30%); colorless prism; mp 134-136.5  $^{\circ}\text{C}$  (from *n*-hexane/ $\text{CH}_2\text{Cl}_2$ );  $R_f$  = 0.4 (*n*-hexane/EtOAc = 2:1);  $^1\text{H}$  NMR (400 MHz,  $\text{CDCl}_3$ )  $\delta$  = 2.31 (3H, s,  $\text{CH}_3$ ), 7.06 (2H, d,  $J$  = 8.2 Hz, Ar-H), 7.17 (1H, d,  $J$  = 7.8 Hz, Ar-H), 7.27 (1H, d,  $J$  = 6.7 Hz, Ar-H), 7.30-7.35 (7H, m, Ar-H), 7.88 (1H, d,  $J$  = 7.8 Hz, Ar-H), 8.02 (1H, s, Ar-H);  $^{13}\text{C}$  NMR (100 MHz,  $\text{CDCl}_3$ )  $\delta$  = 21.1 ( $\text{CH}_3$ ), 110.5 (CH), 120.2 (C), 122.5 (CH), 123.4 (C), 123.9 (CH), 127.6 (CH), 128.1 (CH), 129.8 (CH), 130.4 (CH), 132.4 (CH), 133.3 (C), 134.3 (C), 135.0 (C), 135.4 (CH), 138.8 (C), 142.9 (C), 143.1 (CH);  $^{77}\text{Se}$  NMR (76 MHz,  $\text{CDCl}_3$ )  $\delta$  = 383.2; IR (KBr);  $\nu$  = 1578, 1456, 1280, 1228, 810, 760, 500  $\text{cm}^{-1}$ ; LRMS (EI)  $m/z$  364 ( $\text{M}^+$ , 73), 283 (44), 193 (100), 167 (33), 140 (13), 91 (24); HRMS:  $m/z$   $[\text{M}]^+$  calcd for  $\text{C}_{20}\text{H}_{16}\text{N}_2\text{Se}$ : 364.0479. Found: 364.0472.



### 3. X-ray crystal structure determinations of **2a**

The crystal obtains *p*-hydroquinone which was contained in recrystallization solvent as stabilizer. The colorless prismatic crystal ( $0.100 \times 0.050 \times 0.050$  mm<sup>3</sup>), obtained from diisopropyl ether/hexane, was immersed in Paraton-N oil and placed in the N<sub>2</sub> cold stream at 100 K. Data were collected using diffractometer with CMOS detector (Bruker VENTURE) from Bruker AXS, Cu K $\alpha$ :  $\lambda = 1.54178$  Å). Absorption correction was performed by an empirical method implemented in SADABS.<sup>4</sup> Structure solution and refinement were performed by using SHELXT-2014/5<sup>5</sup> and SHELXL-2018/3<sup>6</sup>.

C<sub>29</sub>H<sub>19</sub>N<sub>4</sub>OSe, *Mr* = 721.67; monoclinic, space group *P*2<sub>1</sub>/*c*, *Z* = 4, *D*<sub>calc</sub> = 1.748 g·cm<sup>-3</sup>, *a* = 7.4069(13), *b* = 20.254(4), *c* = 15.134(3) Å,  $\beta$  = 91.658(4)°, *V* = 2269.5(7) Å<sup>3</sup>, 29686 observed and 4679 independent [*I* > 2σ(*I*)] reflections, 327 parameters, final *R*<sub>1</sub> = 0.0230, *wR*<sub>2</sub> = 0.0620, *S* = 1.083 [*I* > 2σ(*I*)]. CCDC 1918716.

All non-hydrogen atoms were refined anisotropically. The hydrogen atoms were refined isotropically on the calculated positions using a riding model (AFIX 148 and 43) with Uiso values constrained to 1.2/1.5 Ueq of their parent atoms.

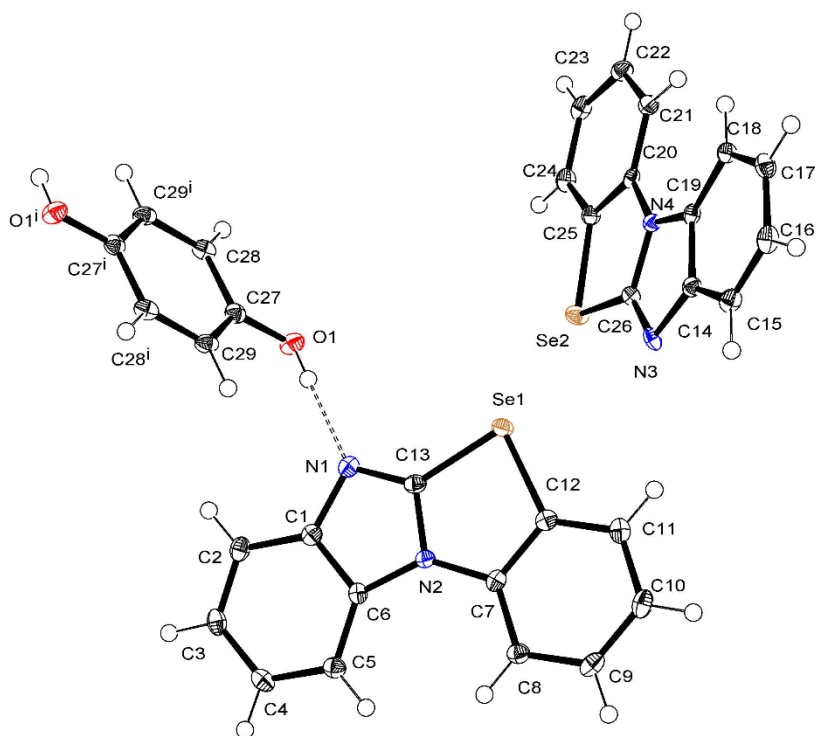

Figure S1. Ortep drawing of **2a** (50% probability)

#### 4. Absorption spectra of benzoimidazo[2,1-*b*]benzoselenoazoles

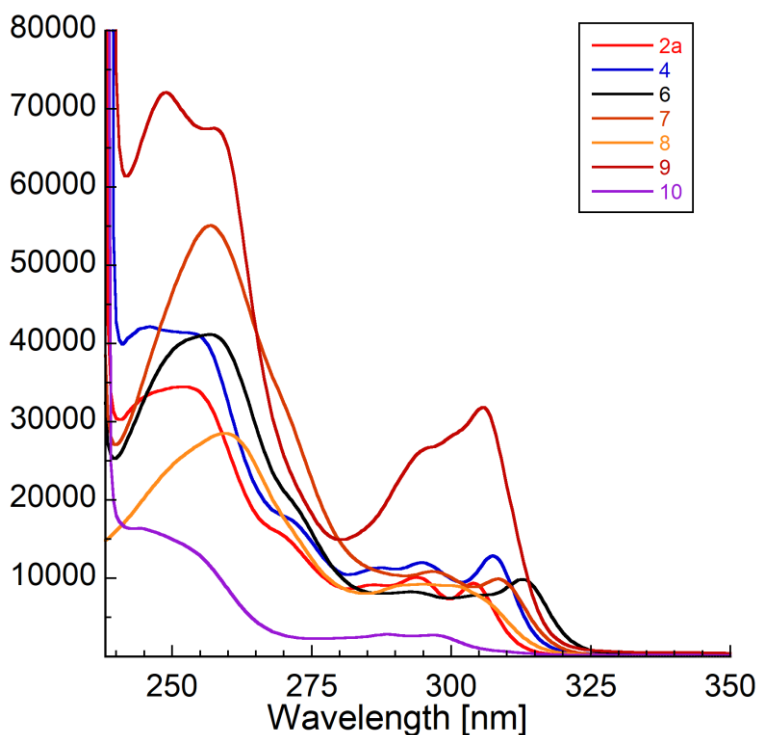

Figure S2. Absorption spectra of Selected compounds in  $\text{CHCl}_3$ .

#### 5. References

1. Diness, F.; Fairlie, D. P. *Angew. Chem. Int. Ed.* **2012**, 51, 8012–8016.
2. Li, Z.; Ke, F.; Deng, H.; Xu, H.; Xiang, H.; Zhou, X. *Org. Biomol. Chem.* **2013**, 11, 2943–2946.
3. Schröder, K.; Enthaler, S.; Bitterlich, B.; Schulz, T.; Spannenberg, A.; Tse, M. K.; Junge, K.; Beller, M. *Chem. Eur. J.* **2008**, 15, 5471–5481.
4. Sheldrick, G. M. (1996). *SADABS*. University of Göttingen, Germany.
5. Sheldrick, G. M. *Acta. Cryst.* **2015**, A71, 3–8.
6. Sheldrick, G. M. *Acta. Cryst.* **2015**, C71, 3–8.

## 7. NMR spectra of new compounds

### $^1\text{H}$ NMR of **1a**

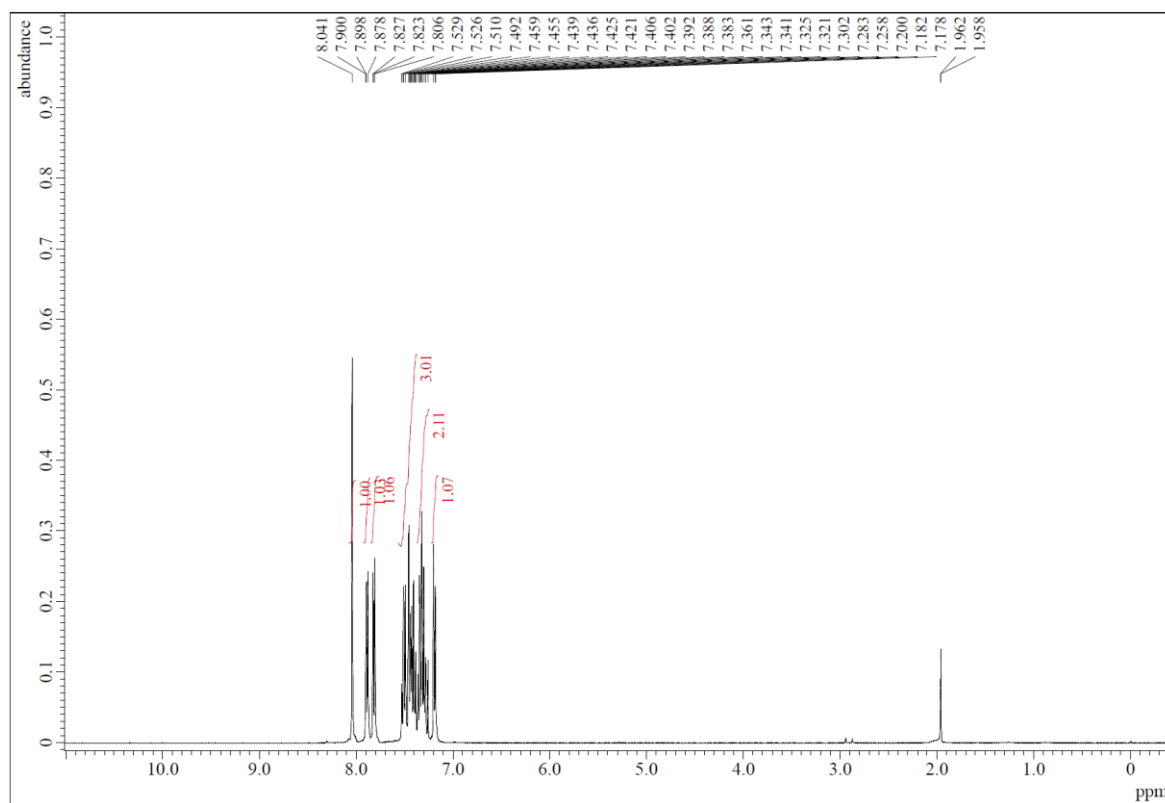

### $^{13}\text{C}$ NMR of **1a**

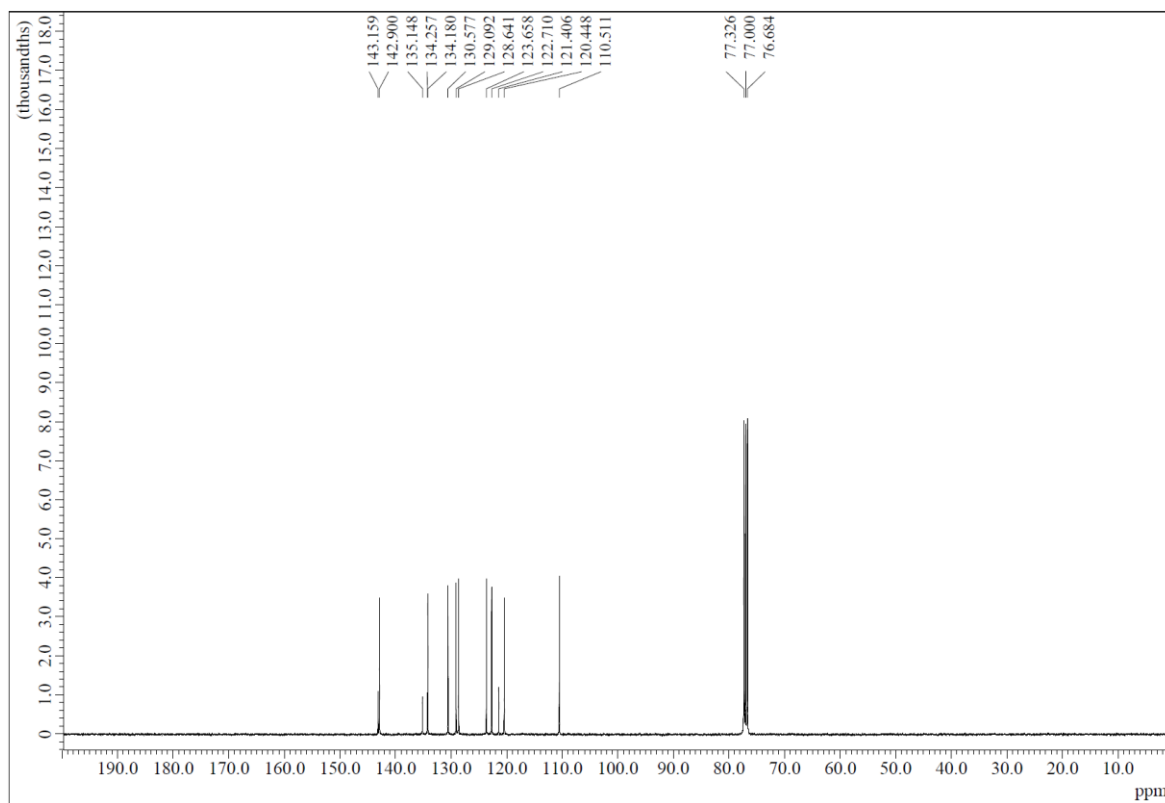

<sup>1</sup>H NMR of **1b**

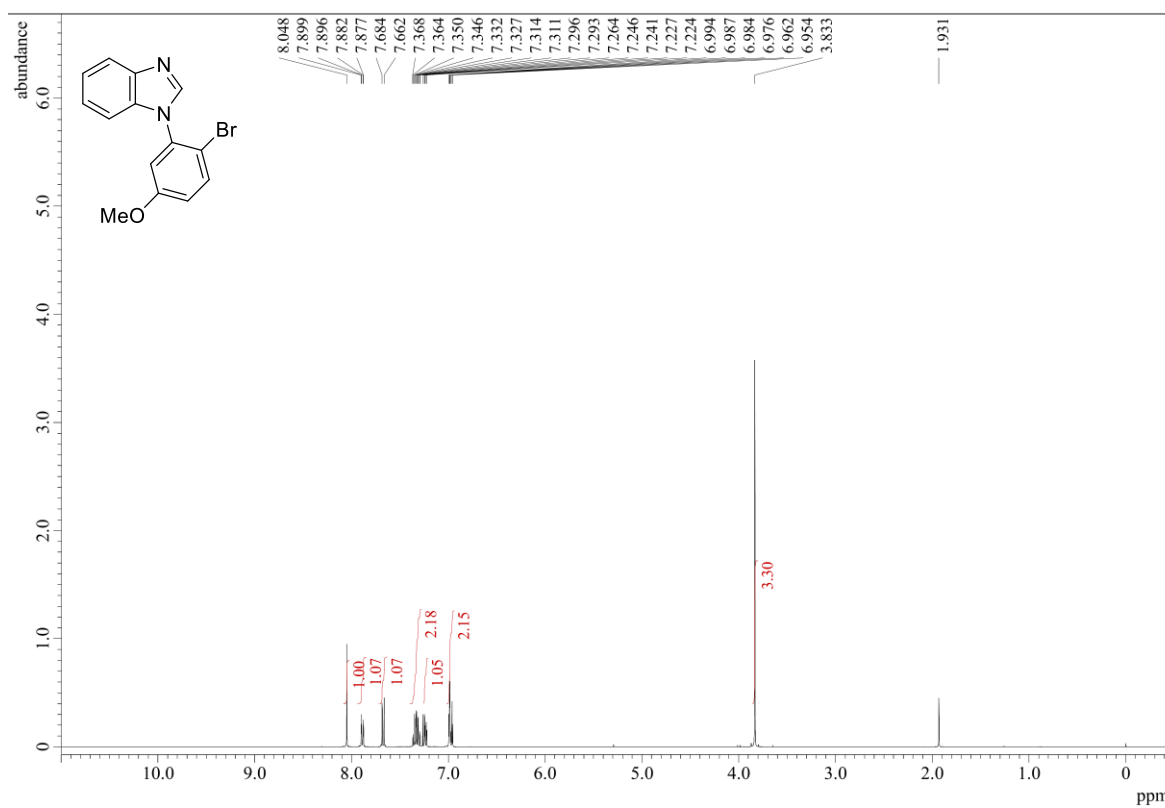

<sup>13</sup>C NMR of **1b**

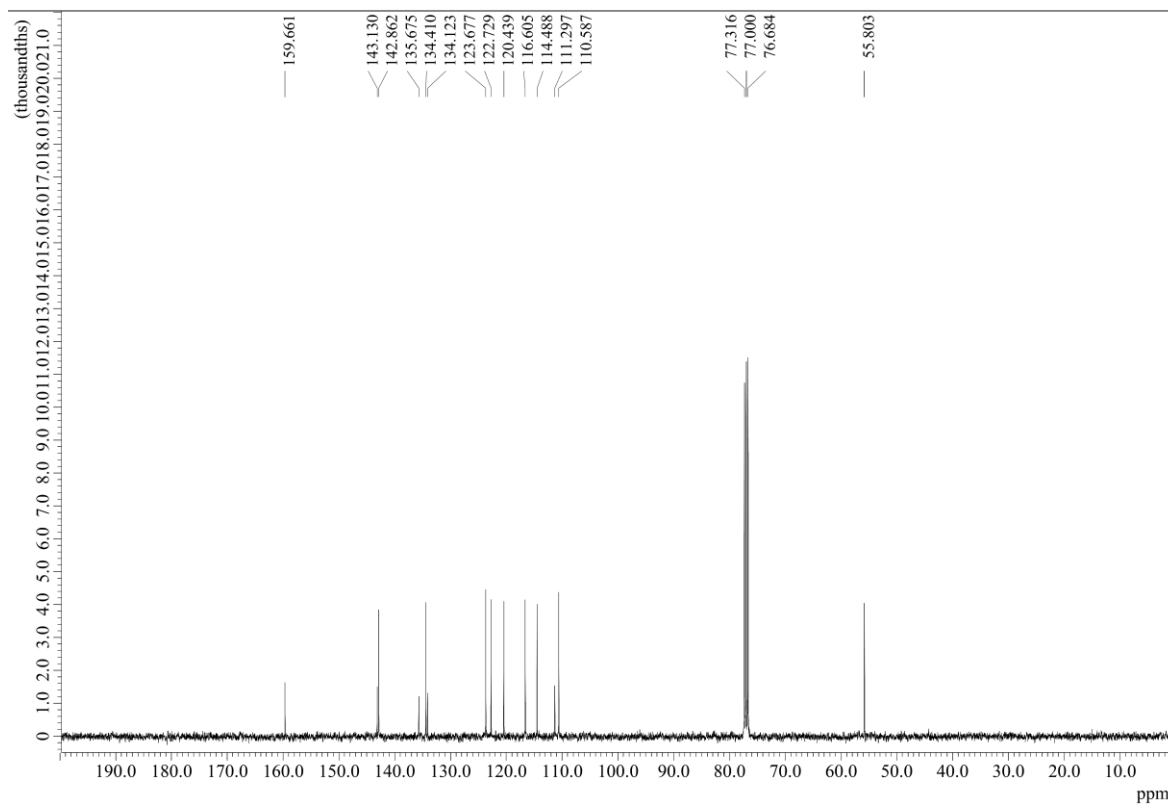

<sup>1</sup>H NMR of **1c**

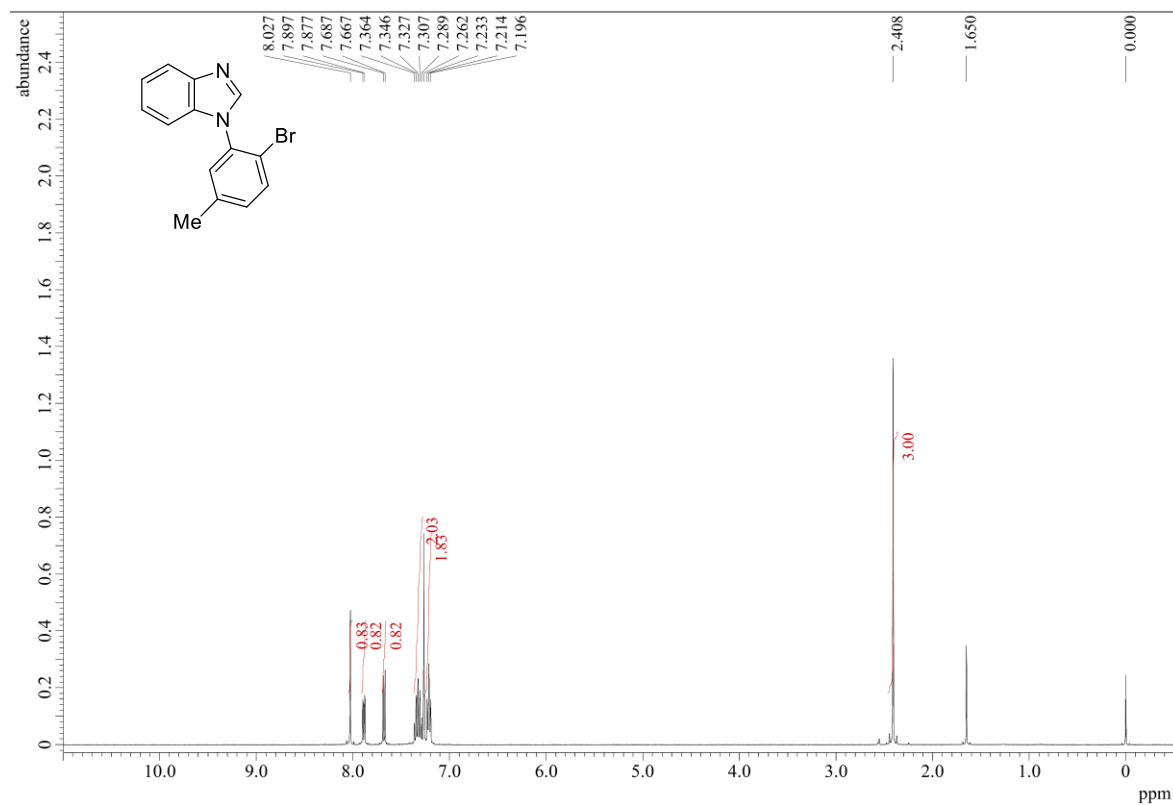

<sup>13</sup>C NMR of **1c**

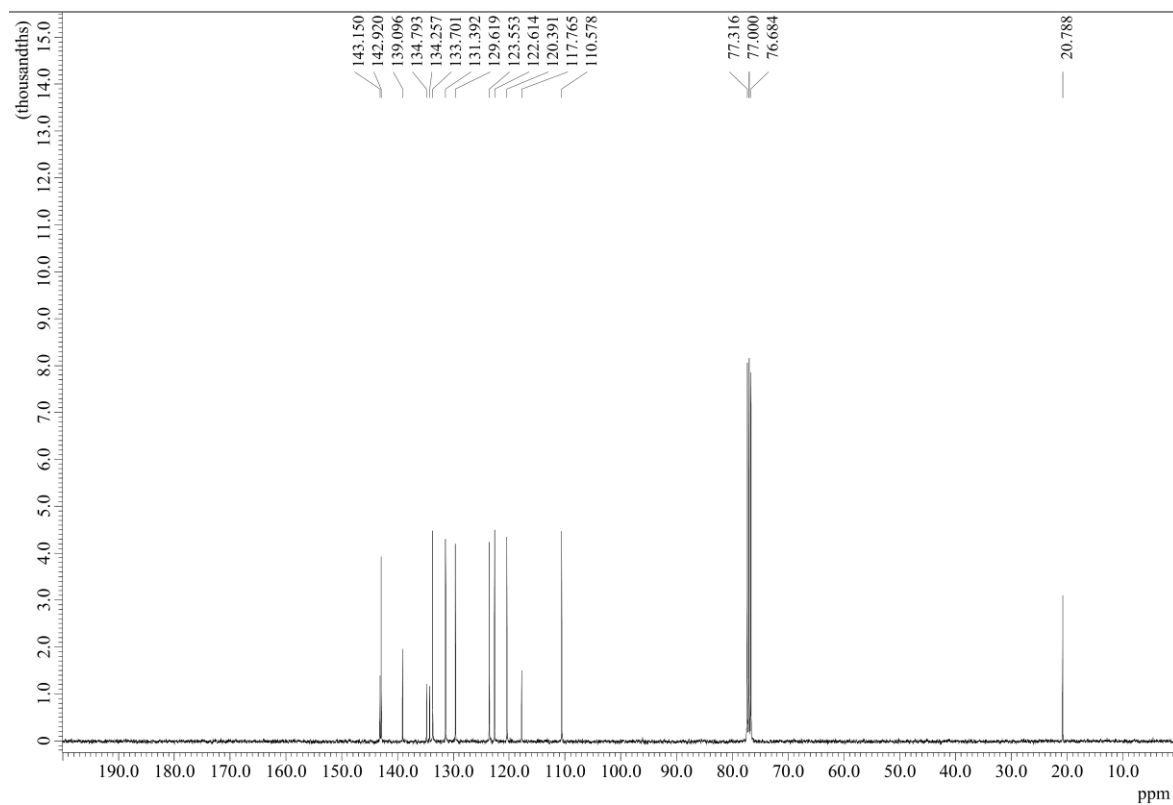

<sup>1</sup>H NMR of **1d**

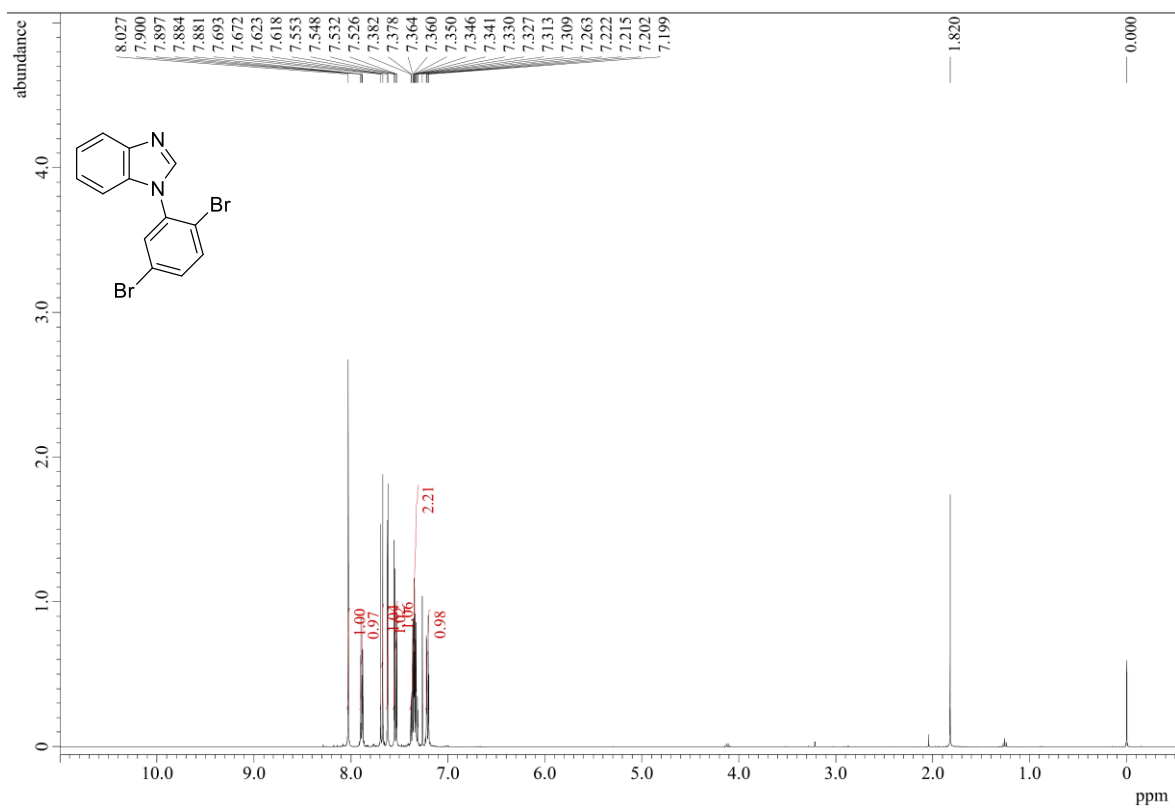

<sup>13</sup>C NMR of **1d**

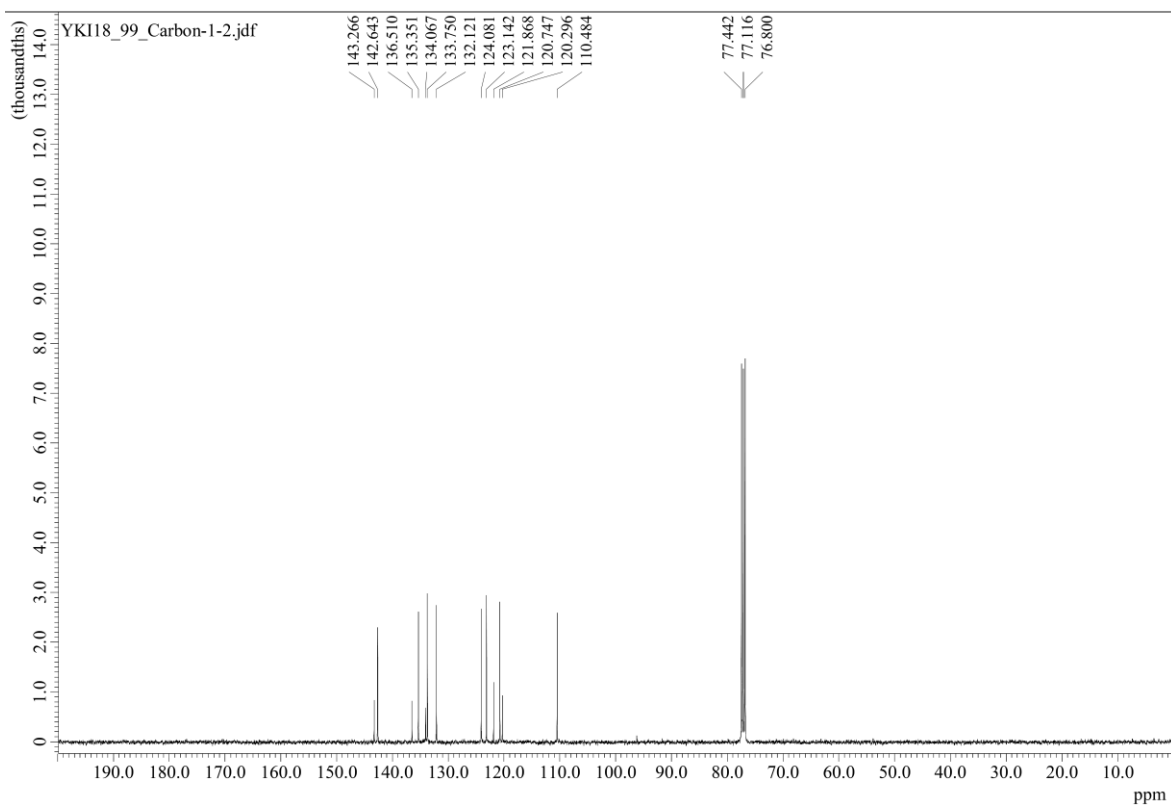

<sup>1</sup>H NMR of **1e**

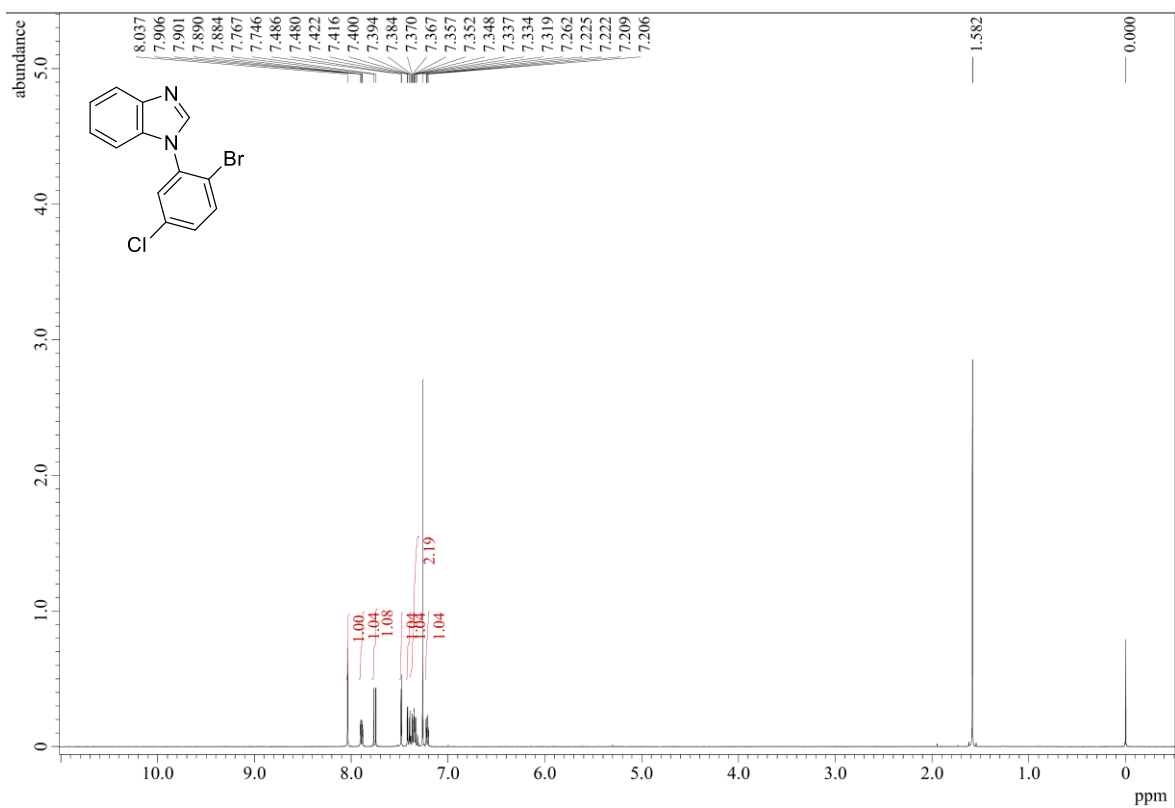

<sup>13</sup>C NMR of **1e**

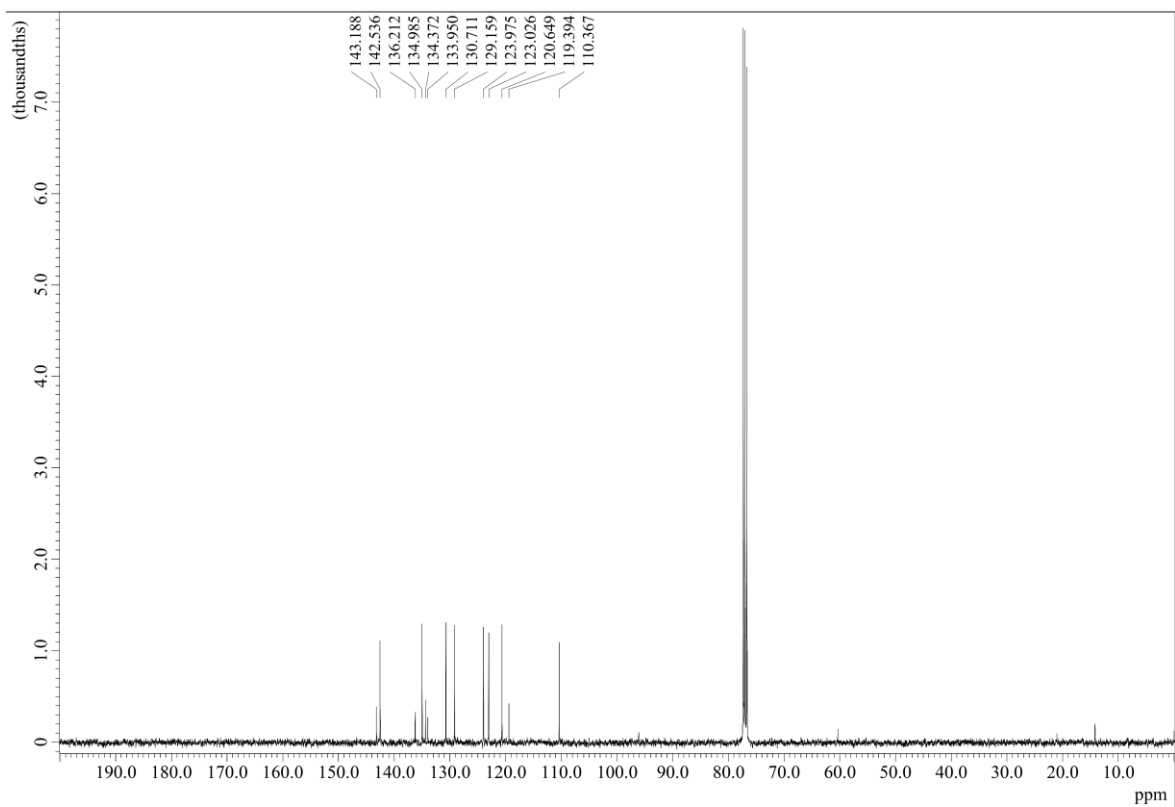

<sup>1</sup>H NMR of **1f**

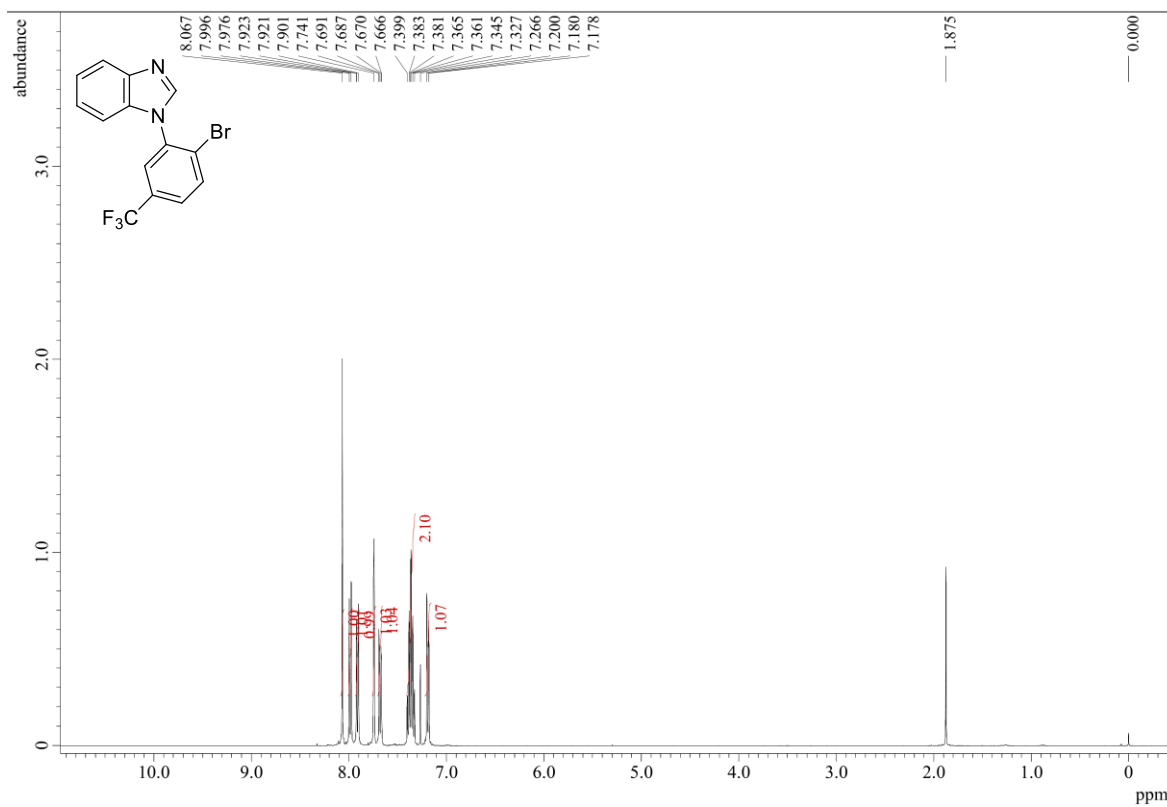

<sup>13</sup>C NMR of **1f**

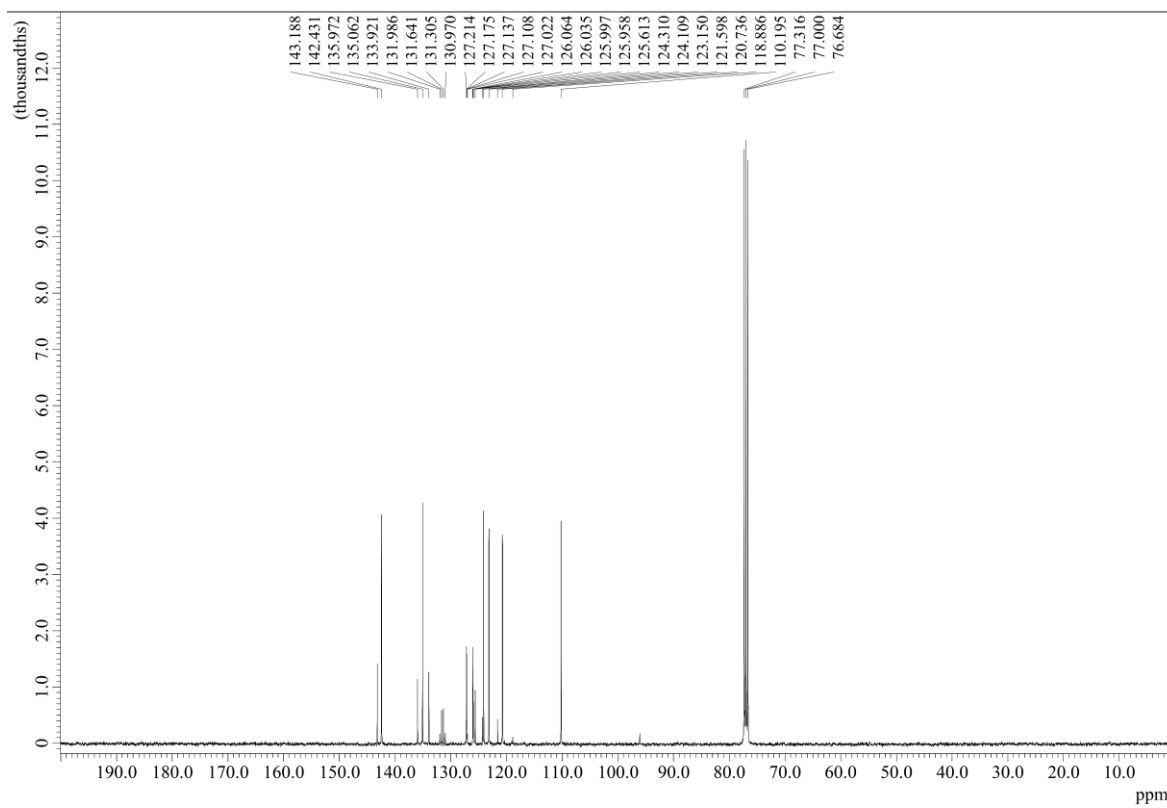



<sup>1</sup>H NMR of **1g**

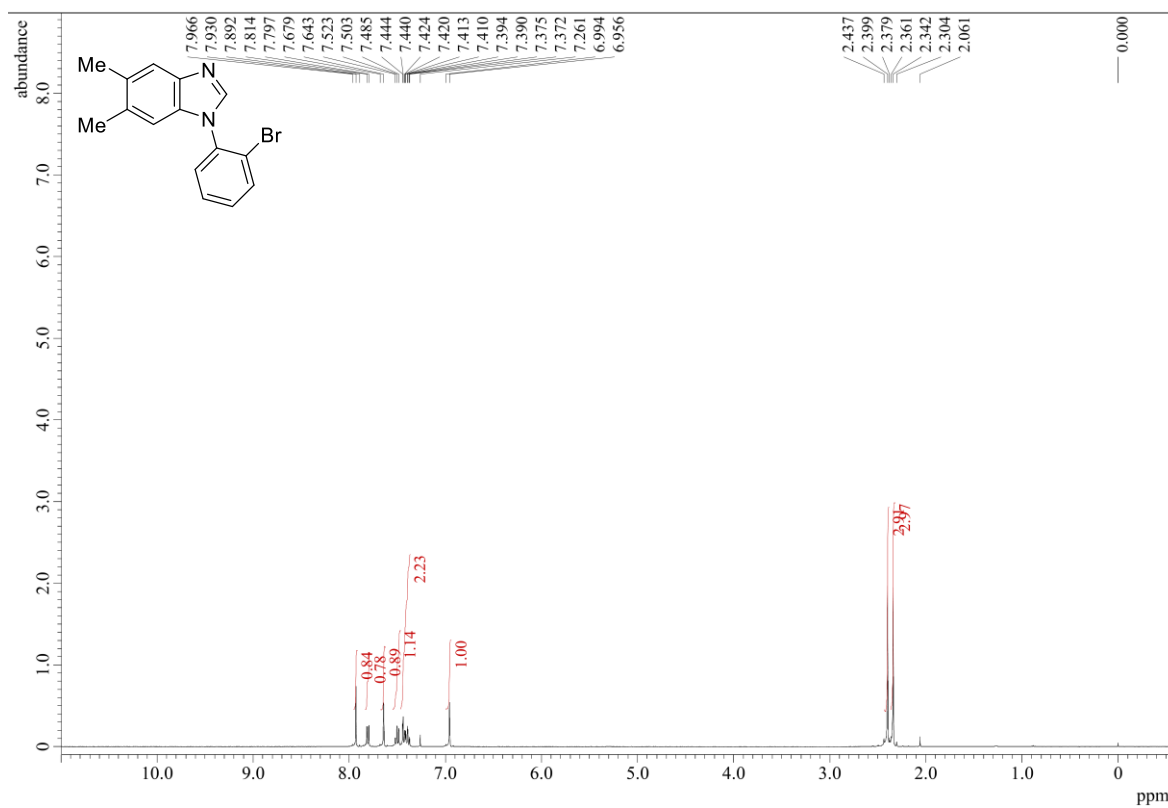

<sup>13</sup>C NMR of **1g**

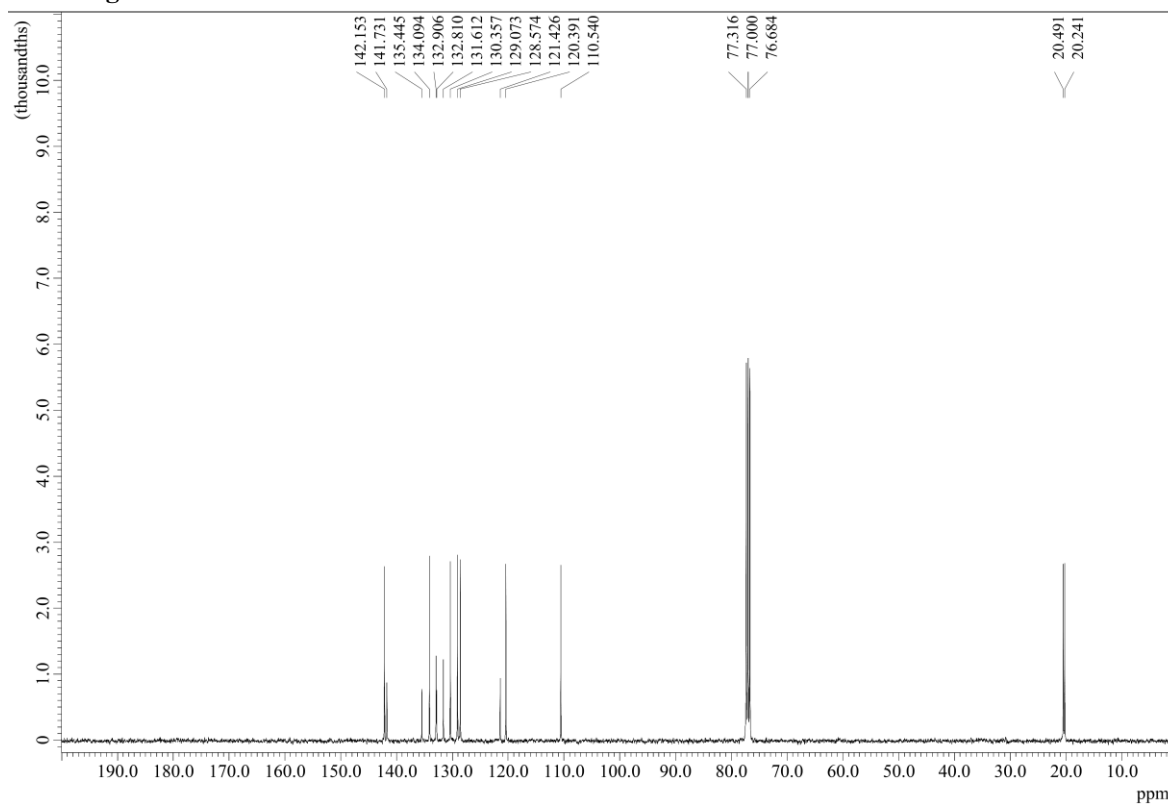

<sup>1</sup>H NMR of **1h**

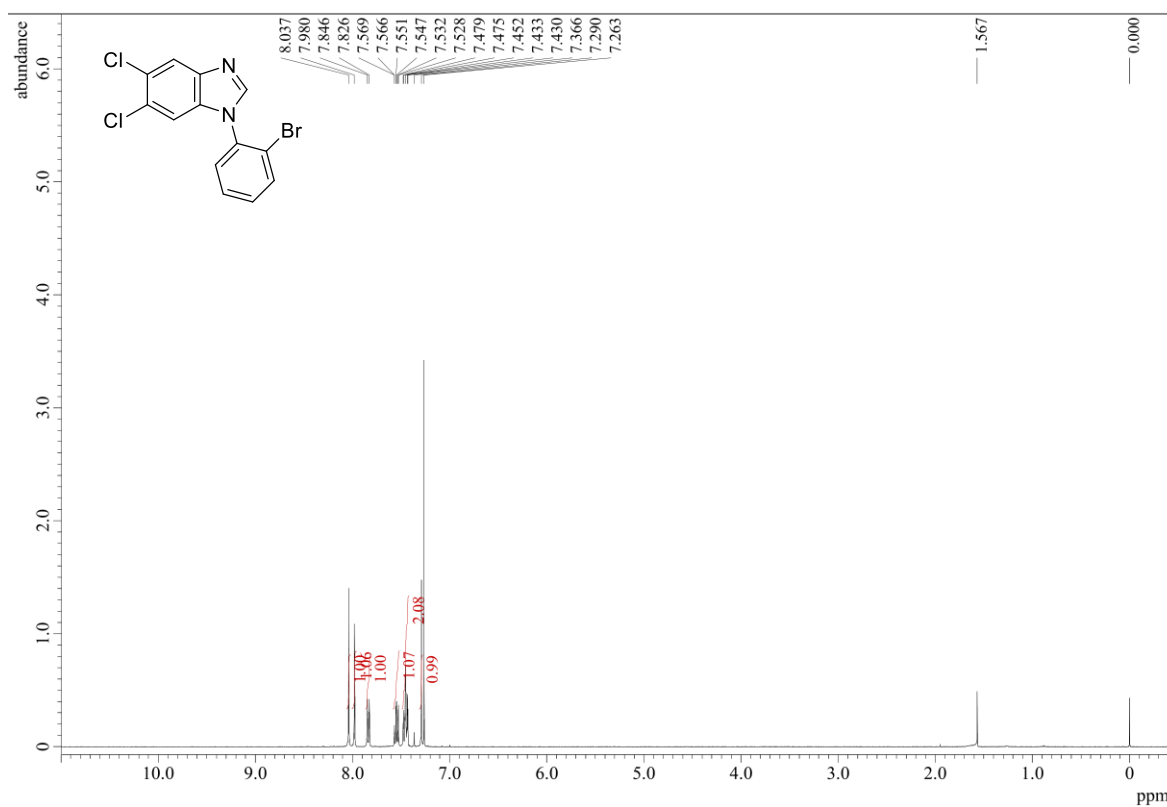

<sup>13</sup>C NMR of **1h**

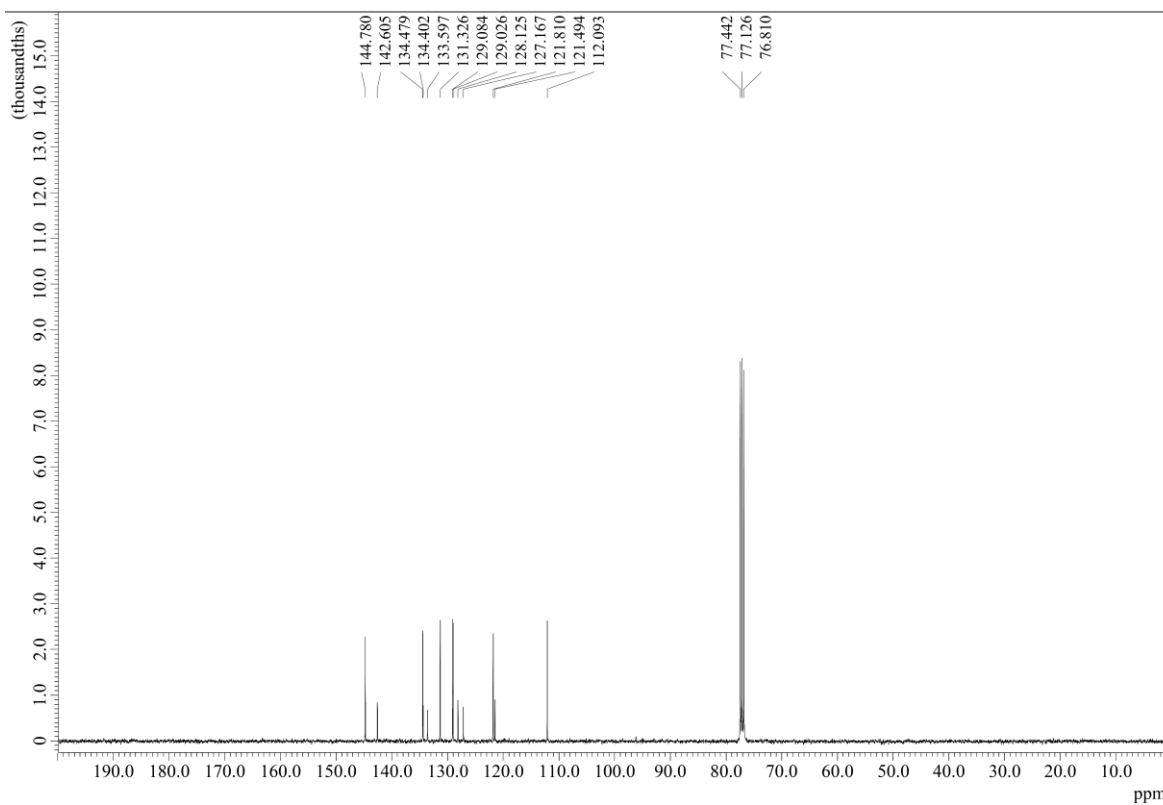

<sup>1</sup>H NMR of **1i**

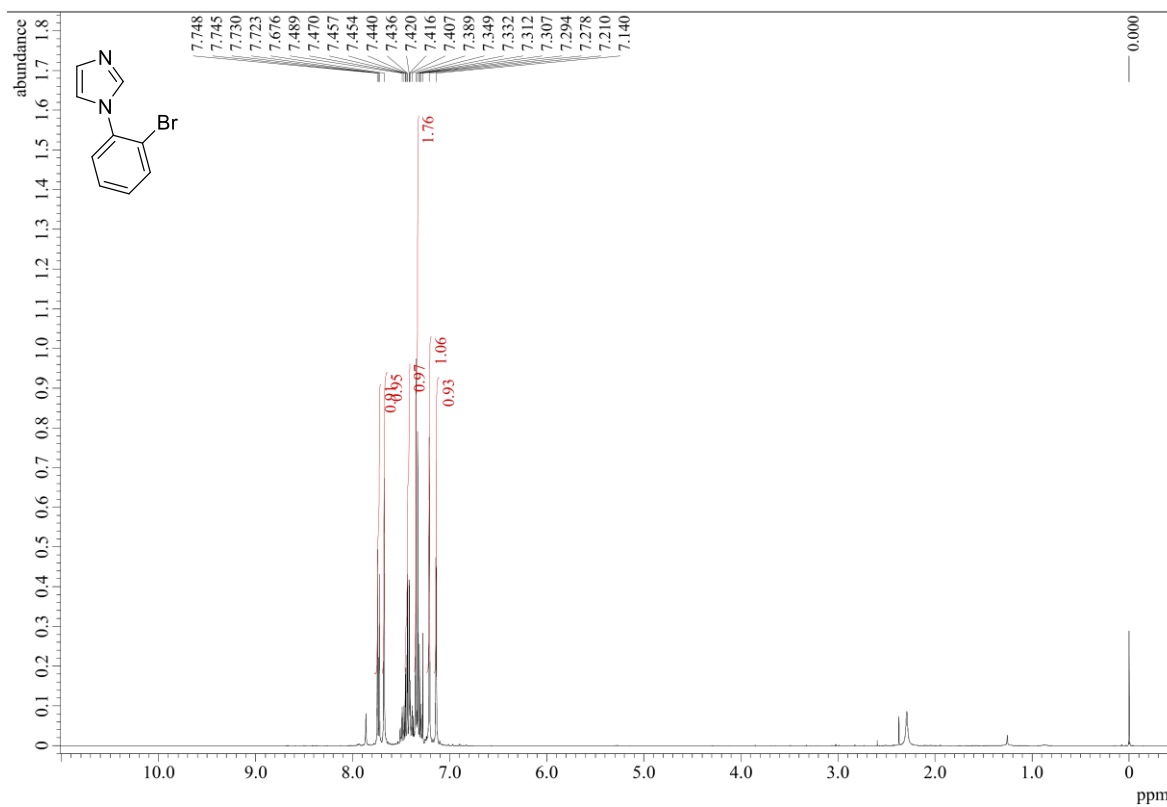

<sup>13</sup>C NMR of **1i**

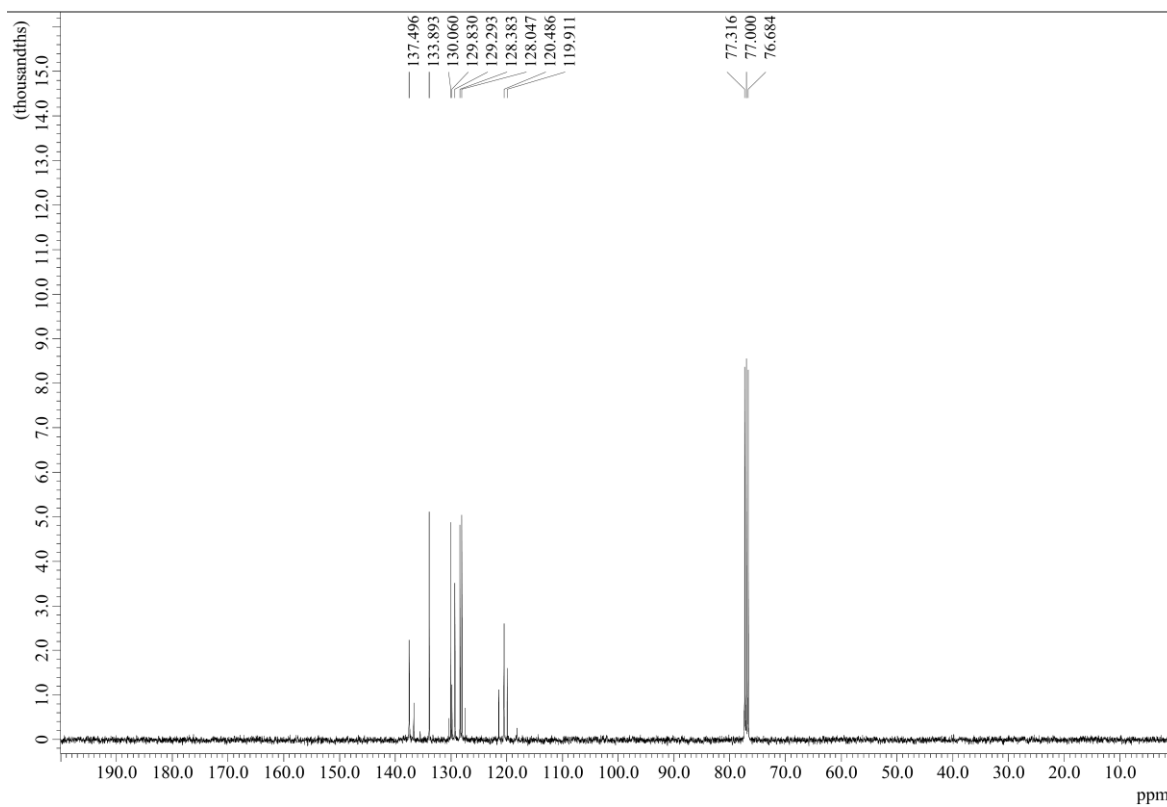

<sup>1</sup>H NMR of **2a**

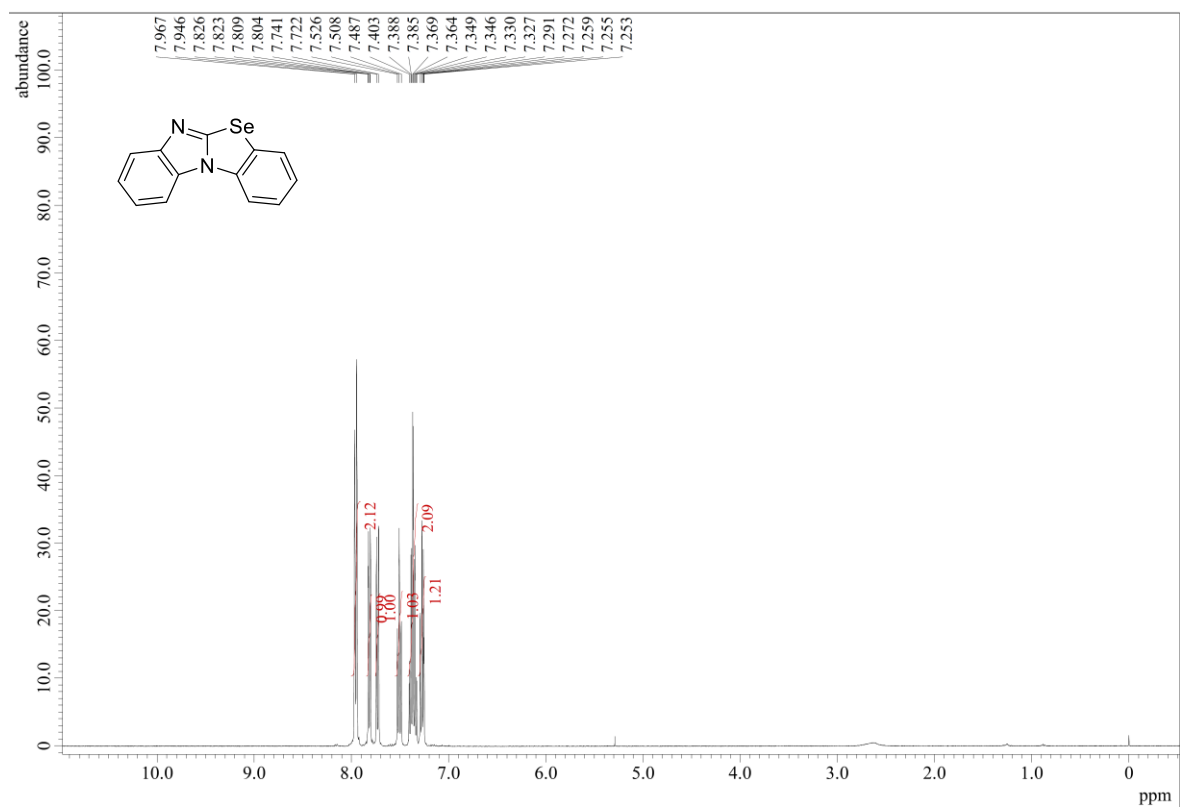

<sup>13</sup>C NMR of **2a**

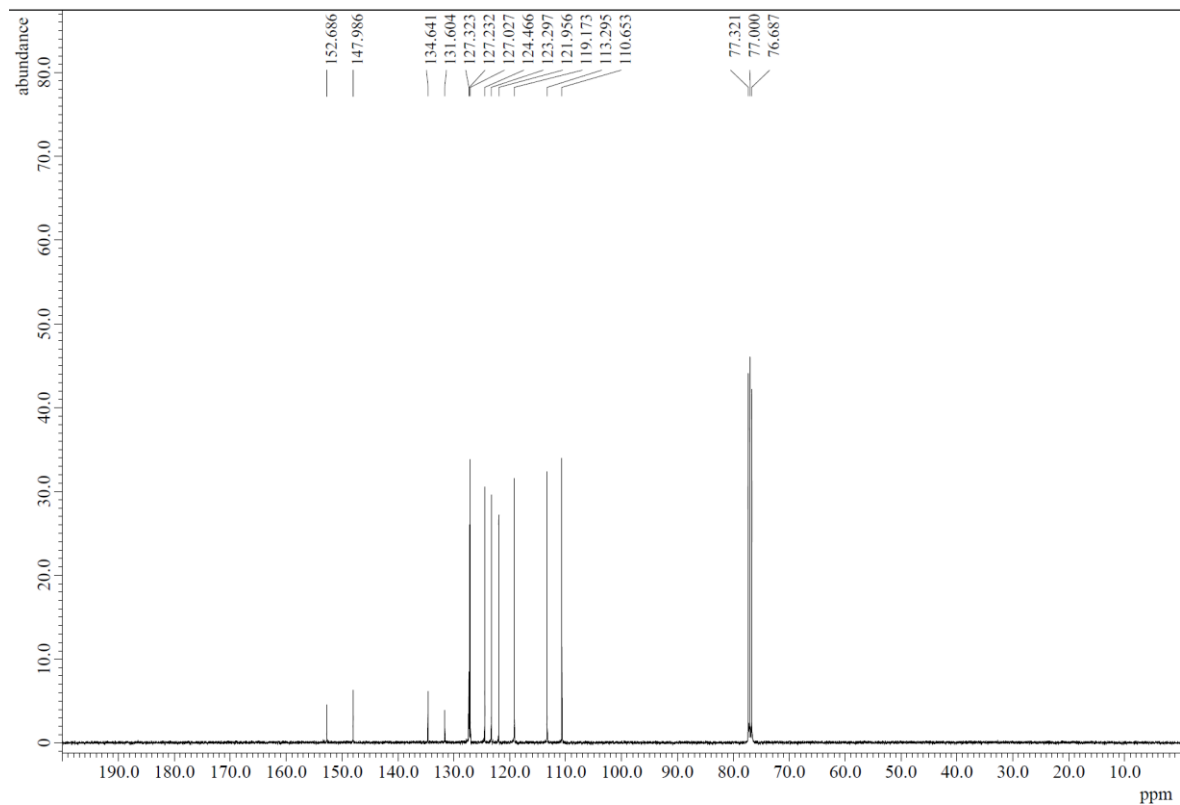

<sup>1</sup>H NMR of **4**

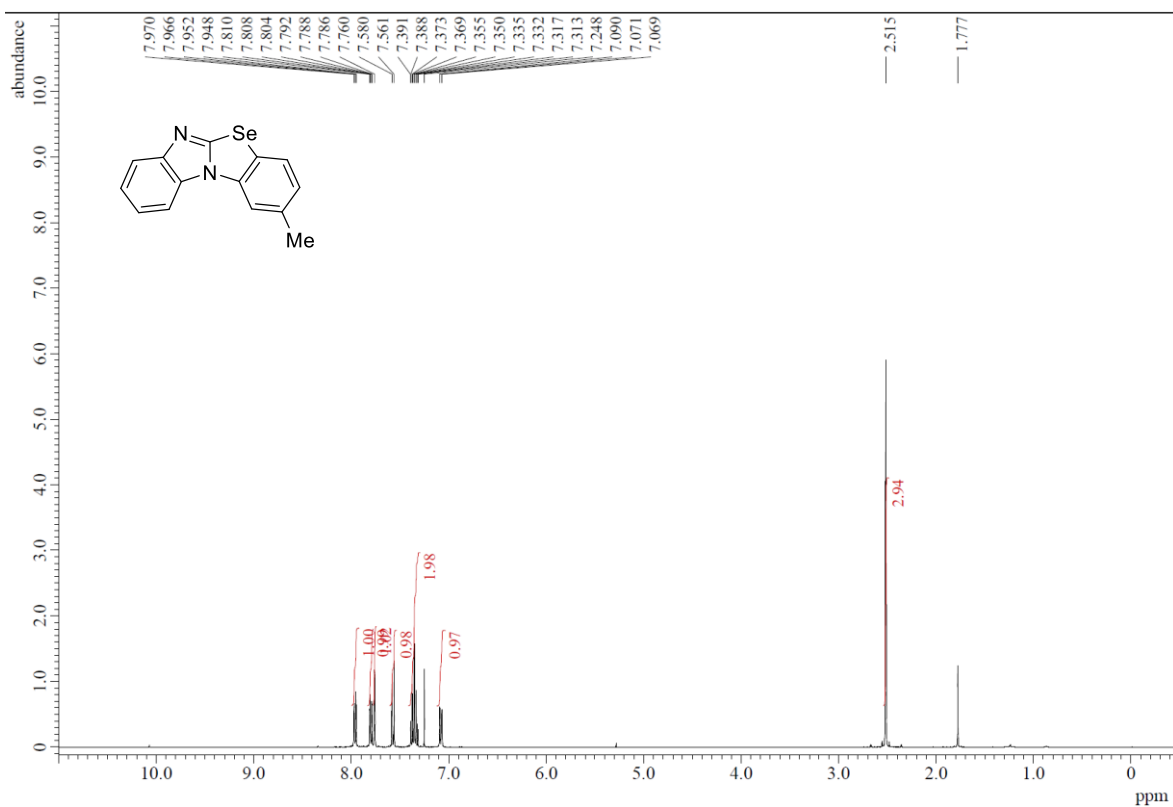

<sup>13</sup>C NMR of **4**

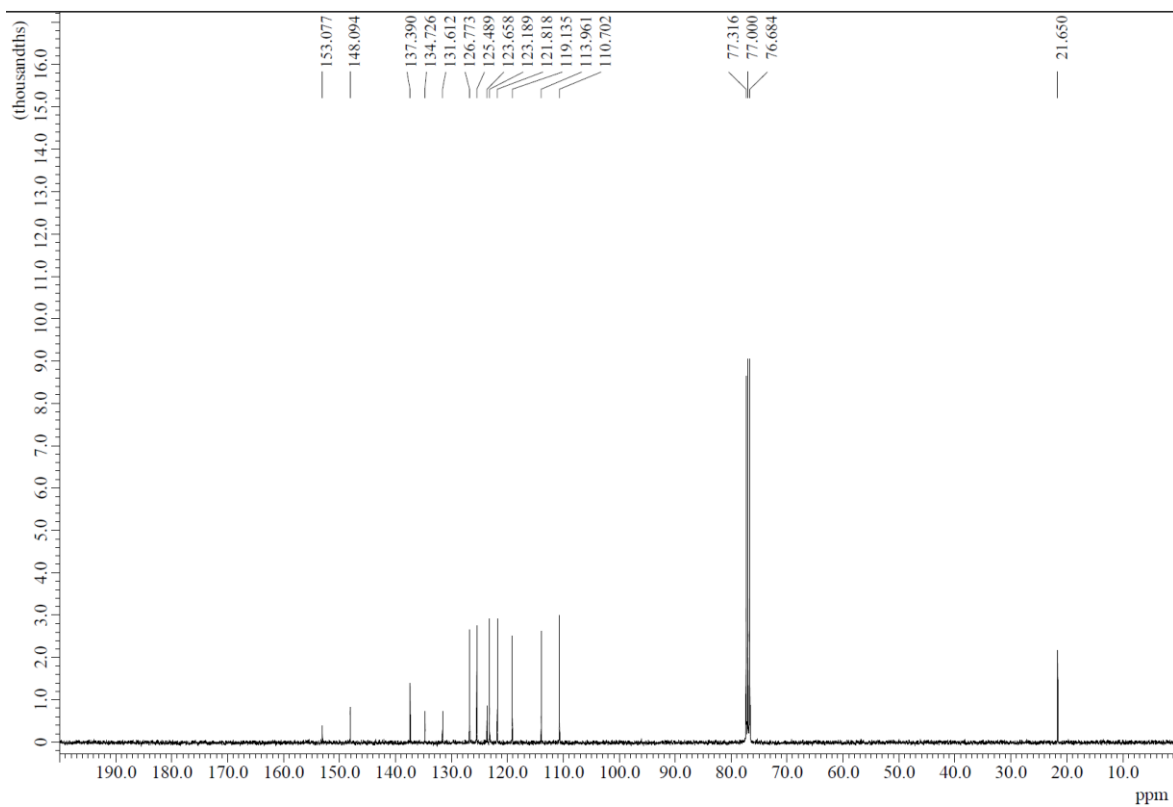

<sup>1</sup>H NMR of **6**

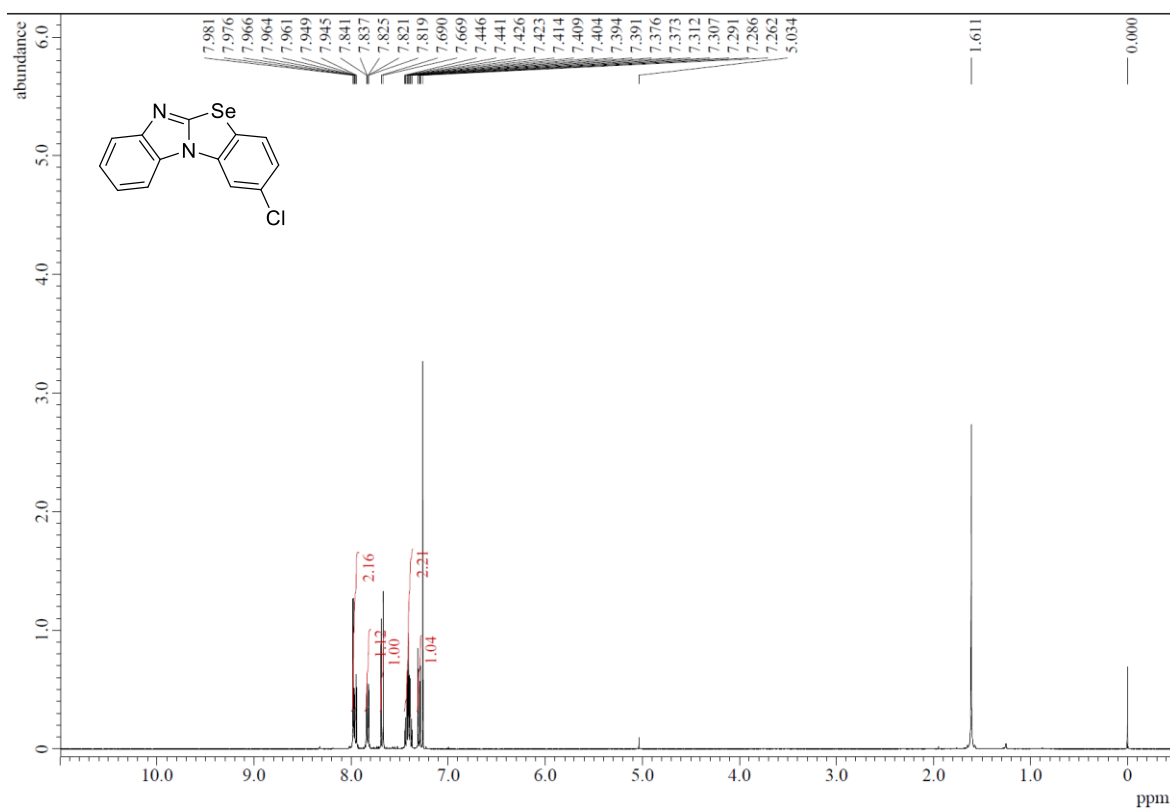

<sup>13</sup>C NMR of **6**

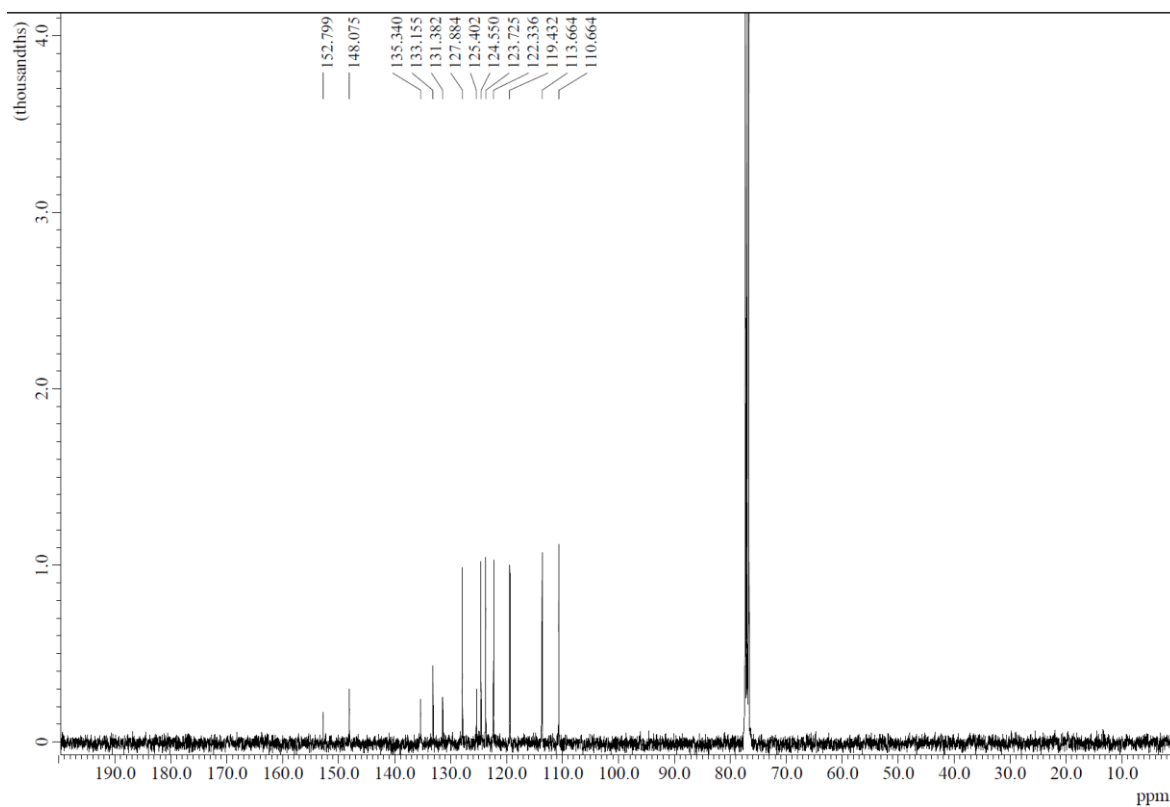

<sup>1</sup>H NMR of **7**

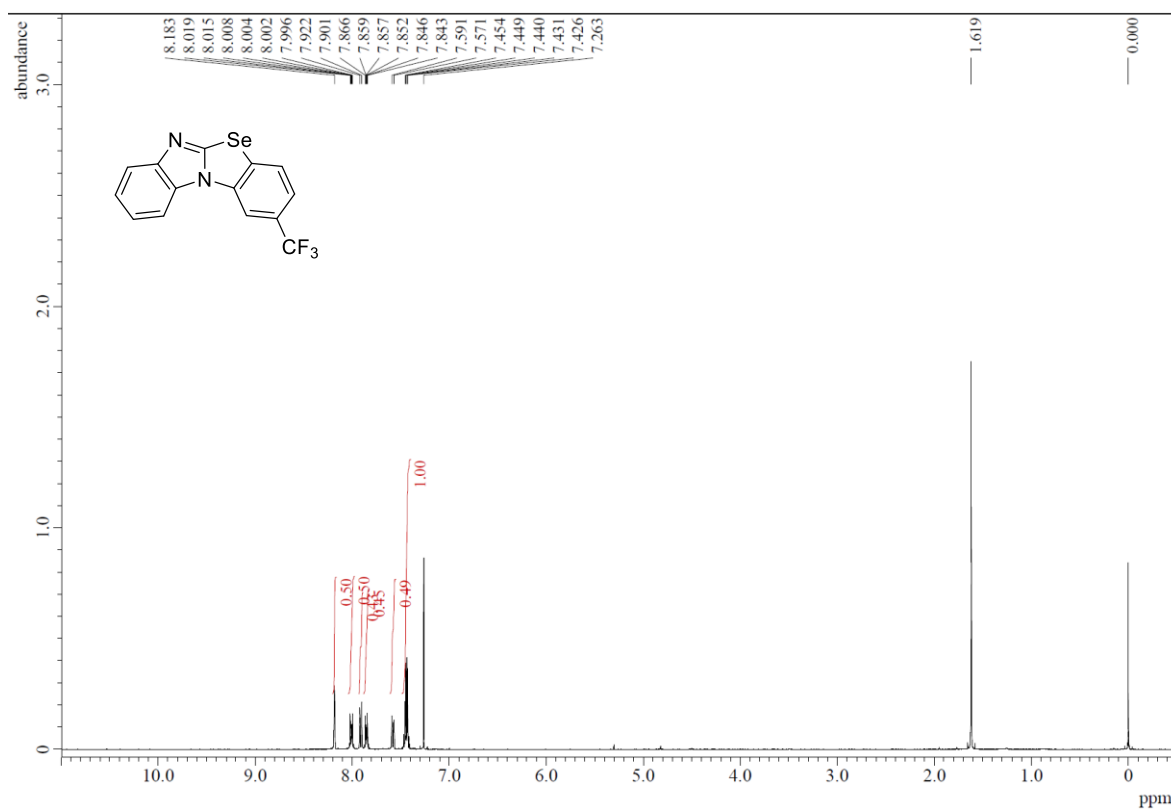

<sup>13</sup>C NMR of **7**

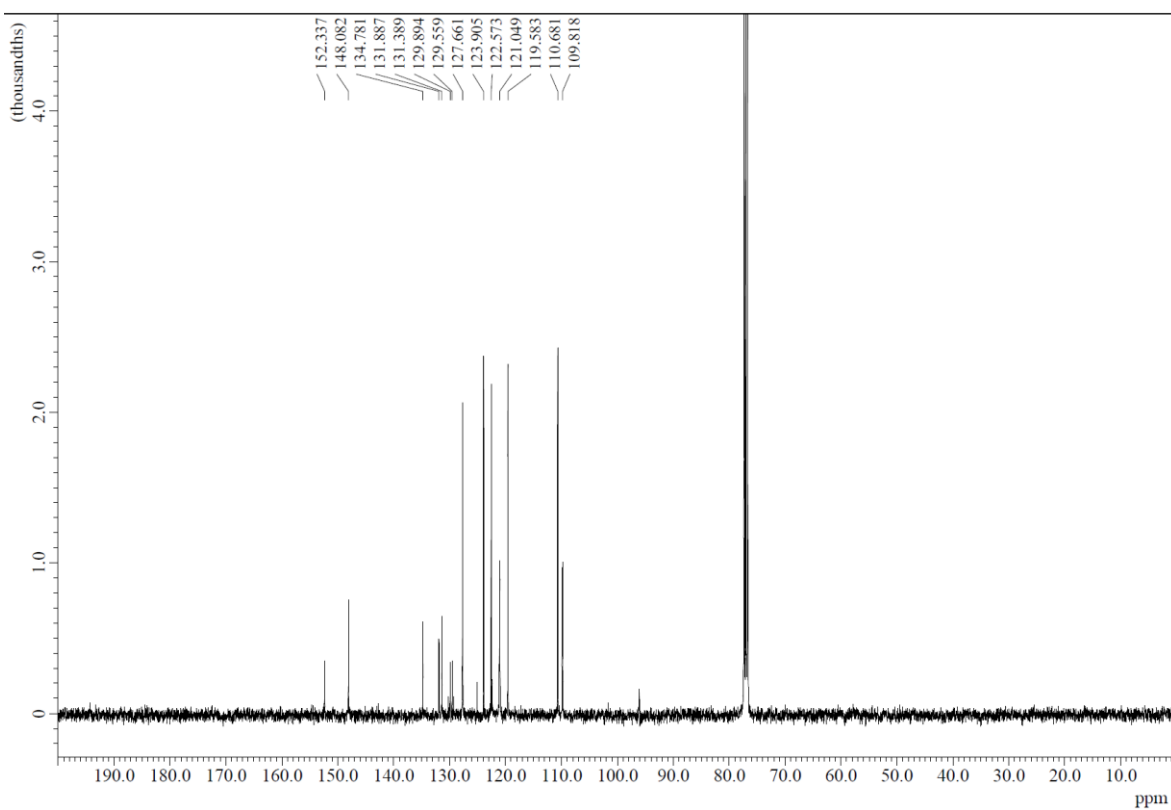

<sup>1</sup>H NMR of **8**

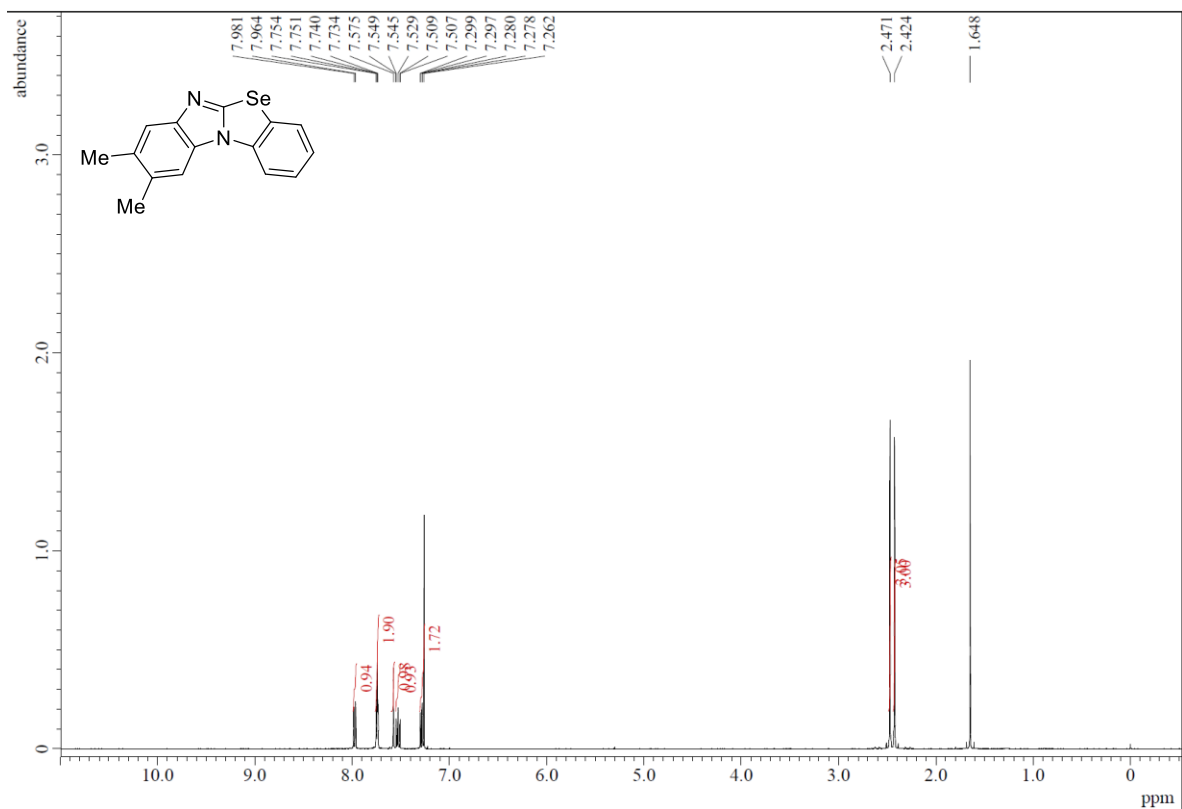

<sup>13</sup>C NMR of **8**

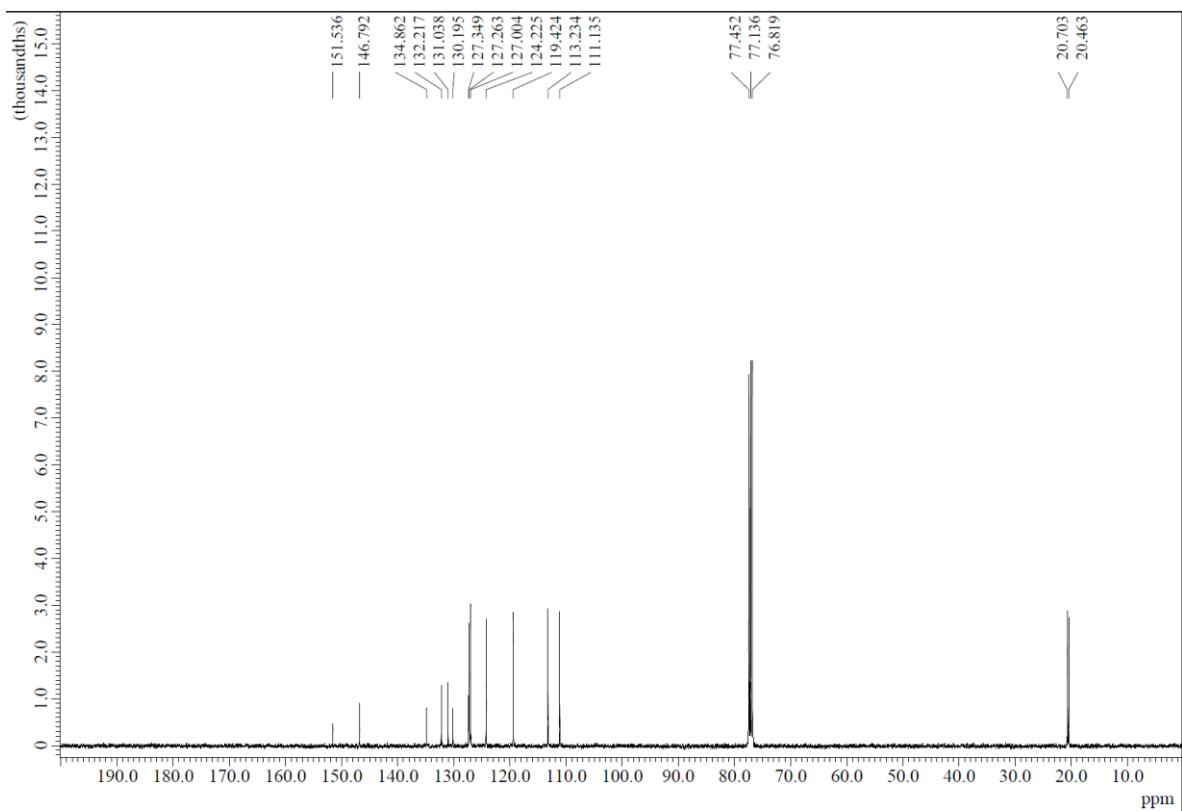



<sup>1</sup>H NMR of **9**

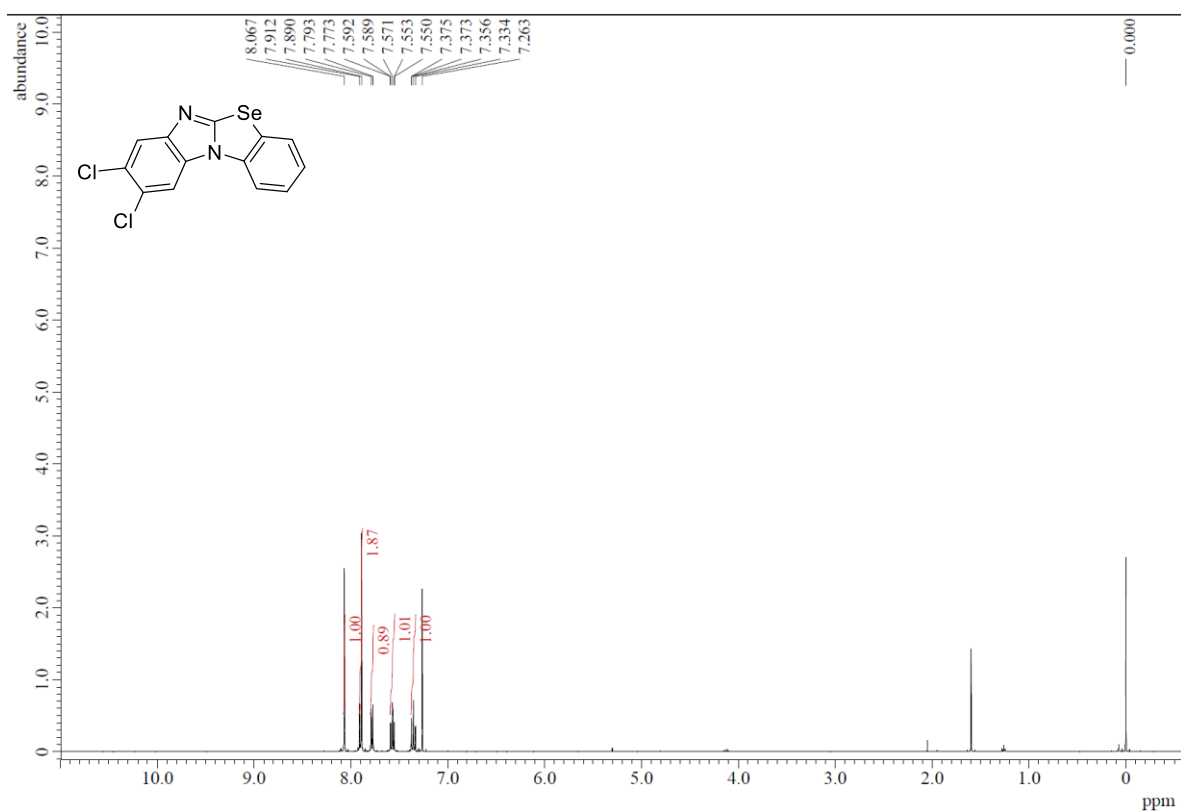

<sup>13</sup>C NMR of **9**

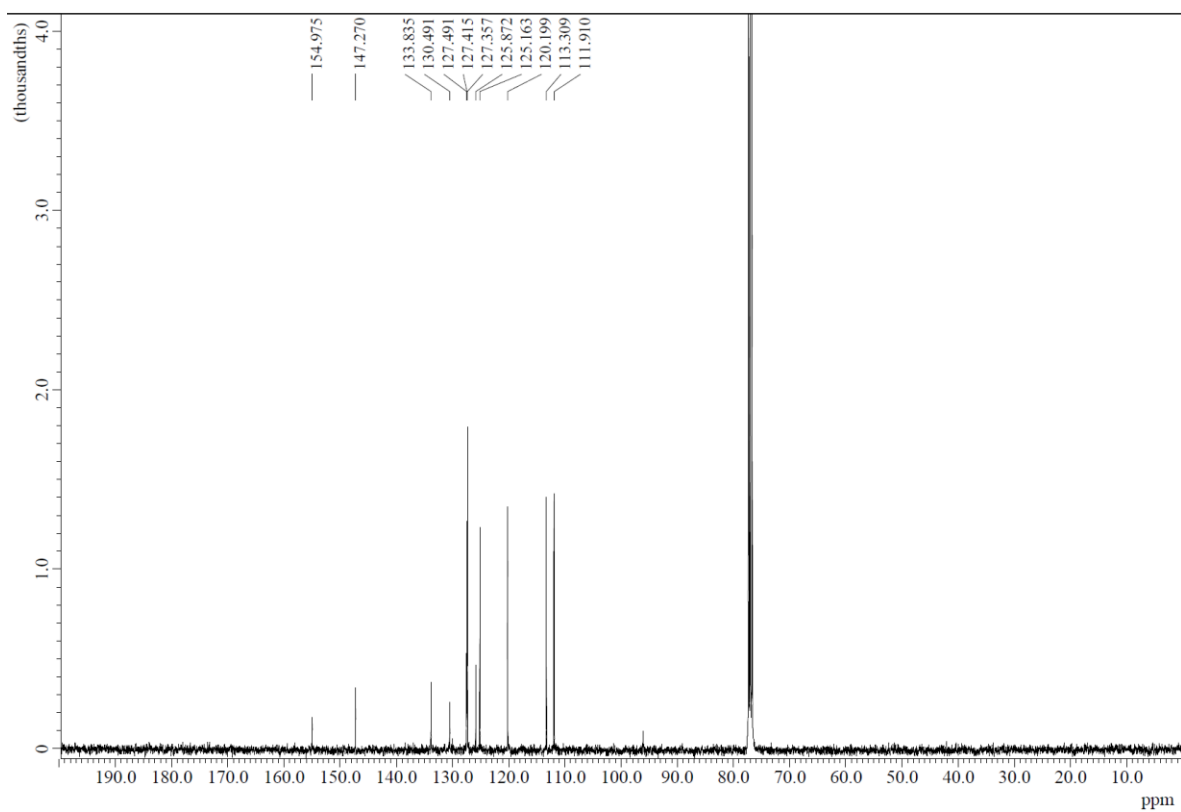

<sup>1</sup>H NMR of **10**

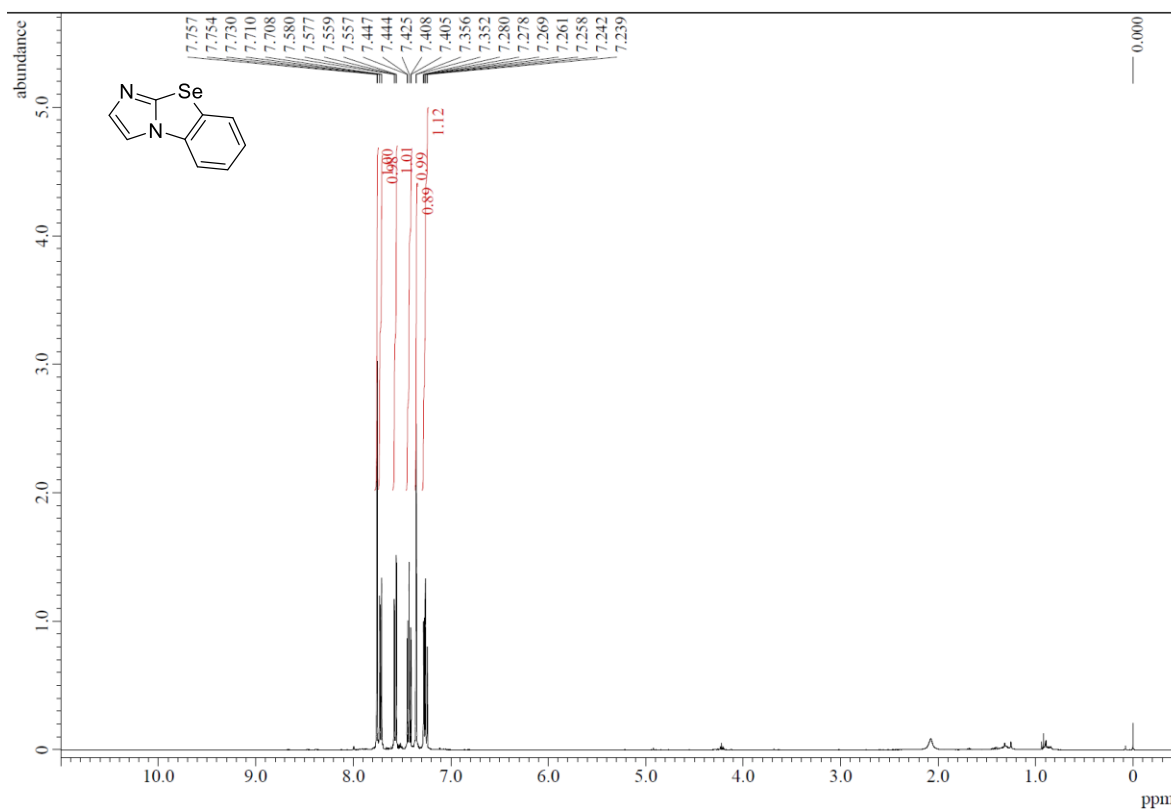

<sup>13</sup>C NMR of **10**

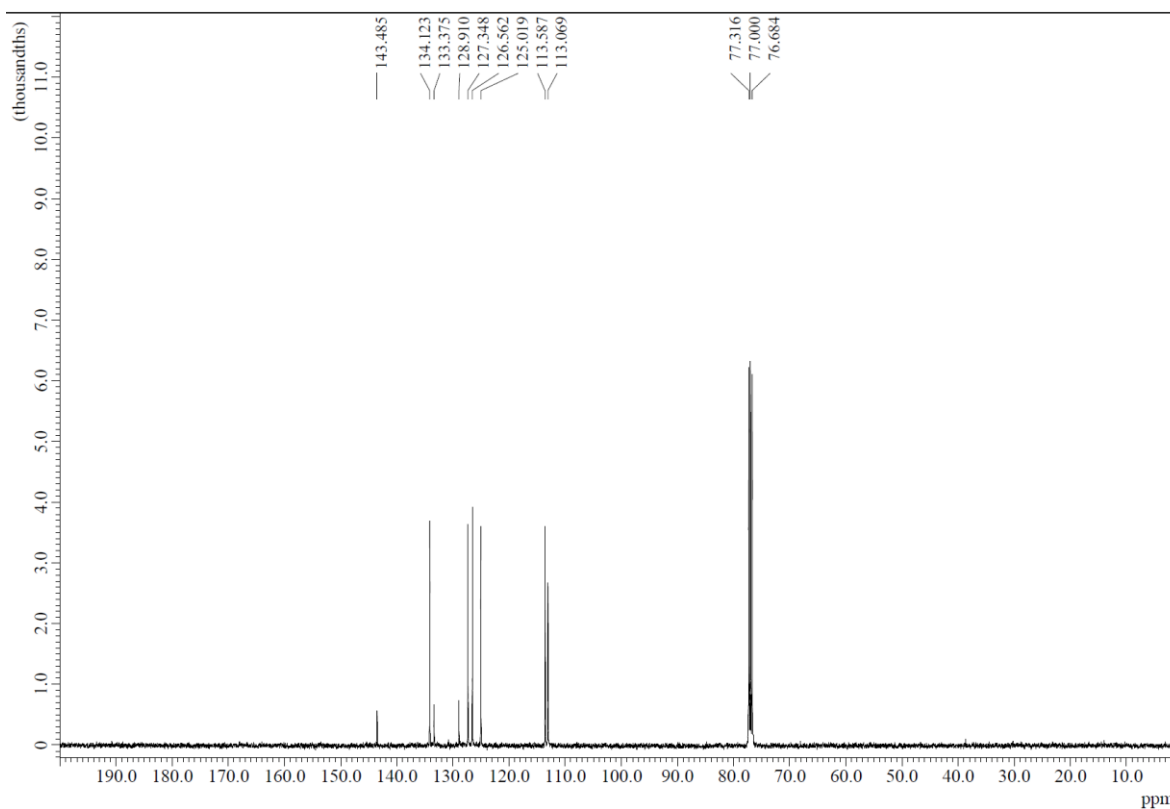

<sup>1</sup>H NMR of **14**

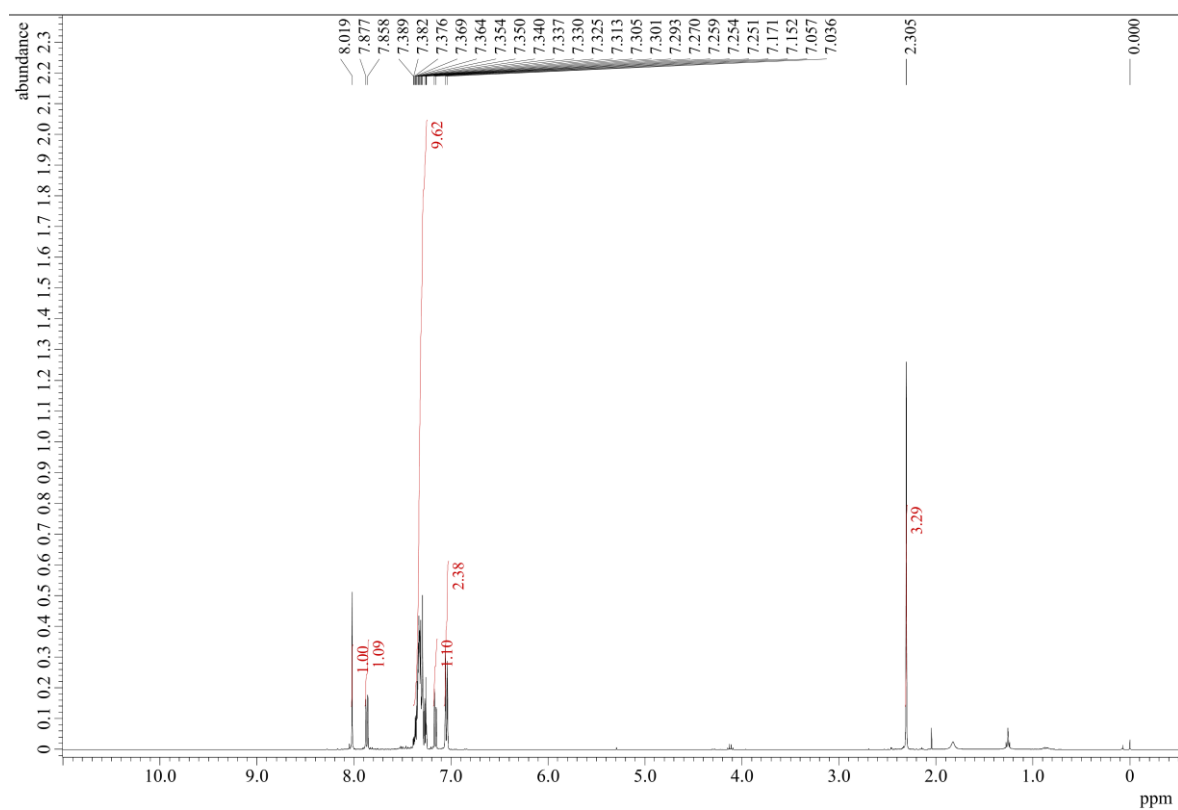

<sup>13</sup>C NMR of **14**

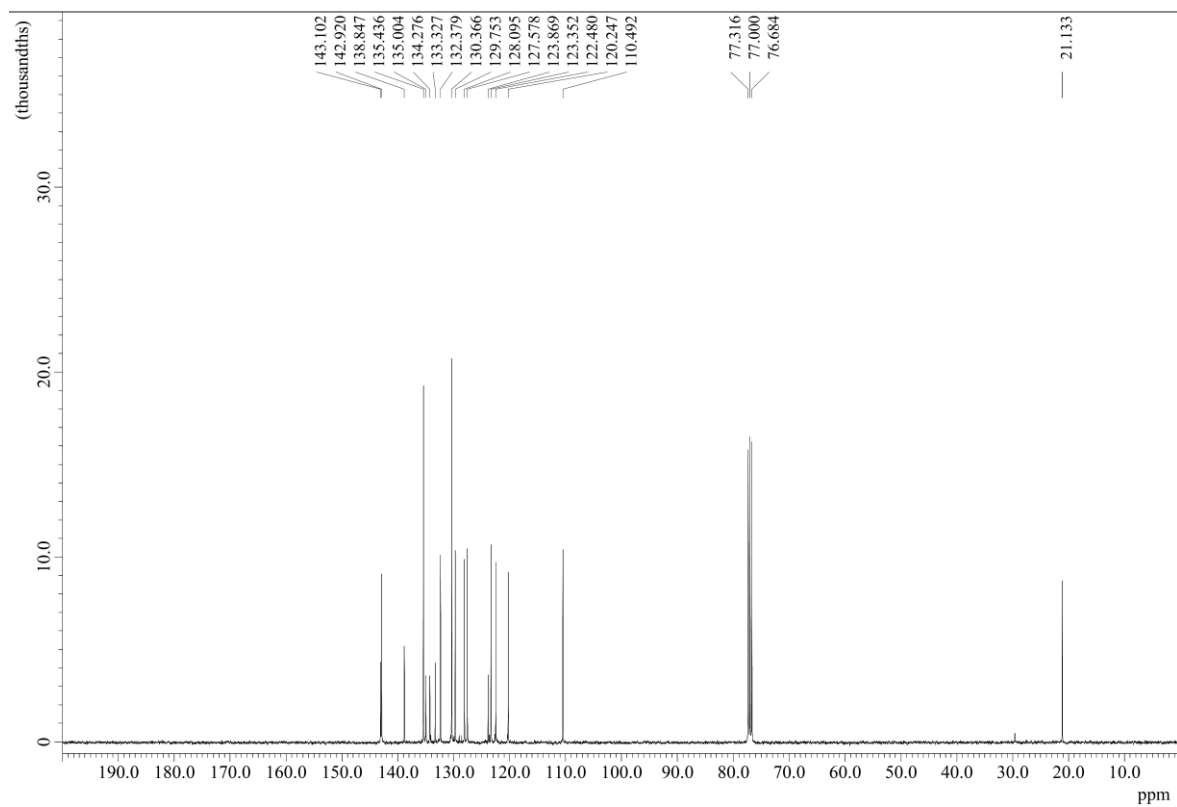

Supplement: Additional file 1 [file 1860-5397-15-199-S1.pdf]
